1  
2  
3 **Non-monotonic recruitment of**  
4 **ventromedial prefrontal cortex during**  
5 **remote memory recall**  
6

7  
8 Daniel N. Barry<sup>1</sup>, Martin J. Chadwick<sup>2</sup> and Eleanor A. Maguire<sup>1\*</sup>  
9

10  
11  
12 <sup>1</sup>Wellcome Centre for Human Neuroimaging, Institute of Neurology, University College London,  
13 12 Queen Square, London, WC1N 3AR, UK

14  
15 <sup>2</sup>Institute of Behavioural Neuroscience, Department of Experimental Psychology, Division of  
16 Psychology and Language Sciences, University College London, 26 Bedford Way, London, WC1H  
17 OAP, UK  
18  
19  
20

21  
22 \*Corresponding author: [e.maguire@ucl.ac.uk](mailto:e.maguire@ucl.ac.uk)

23  
24 Short title: vmPFC and remote memory  
25  
26  
27  
28

29 **Abstract**

30 Systems-level consolidation refers to the time-dependent reorganisation of memory traces in the  
31 neocortex, a process in which the ventromedial prefrontal cortex (vmPFC) has been implicated.  
32 Capturing the precise temporal evolution of this crucial process in humans has long proved elusive. Here,  
33 we used multivariate methods and a longitudinal functional MRI design to detect, with high granularity,  
34 the extent to which autobiographical memories of different ages were represented in vmPFC and how  
35 this changed over time. We observed an unexpected time-course of vmPFC recruitment during retrieval,  
36 rising and falling around an initial peak of 8-12 months, before re-engaging for older two and five year  
37 old memories. This pattern was replicated in two independent sets of memories. Moreover, it was  
38 further replicated in a follow-up study eight months later with the same participants and memories,  
39 where the individual memory representations had undergone their hypothesised strengthening or  
40 weakening over time. We conclude that the temporal engagement of vmPFC in memory retrieval seems  
41 to be non-monotonic, revealing a complex relationship between systems-level consolidation and  
42 prefrontal cortex recruitment that is unaccounted for by current theories.

43

44

## 45 **Author Summary**

46 Our past experiences are captured in autobiographical memories which allow us to recollect events from  
47 our lives long after they originally occurred. A part of the brain's frontal lobe, called the ventromedial  
48 prefrontal cortex or vmPFC, is known to be important for supporting autobiographical memories  
49 especially as memories become more remote. The precise temporal profile of the vmPFC's involvement  
50 is unclear, yet this information is vital if we are to understand how memories change over time and the  
51 mechanisms involved. In this study we sought to establish the time-course of vmPFC engagement in the  
52 recollection of autobiographical memories while participants recalled memories of different ages during  
53 functional magnetic resonance imaging (fMRI). Using a method that detects brain activity patterns  
54 associated with individual memories, we found that memory-specific neural patterns in vmPFC became  
55 more distinct over the first few months after a memory was formed, but then this initial involvement of  
56 vmPFC subsided after one year. However, more remote memories (two years and older), appeared to re-  
57 engage vmPFC once again. This temporal profile is difficult to accommodate within any single existing  
58 theory. Consequently, our results provoke a re-think about how memories evolve over time and the role  
59 played by the vmPFC.

60

61

## 62 **Introduction**

63 We possess a remarkable ability to retrieve, with ease, one single experience from a lifetime of  
64 memories. How these individual autobiographical memories are represented in the brain over time is a  
65 central question of memory neuroscience which remains unanswered.

66 Consolidation takes place on two levels which differ on both a spatial and temporal scale. On a  
67 cellular level, the stabilisation of new memory traces through modification of synaptic connectivity takes  
68 only a few hours [1], and is heavily dependent upon the hippocampus [2-5]. On a much longer timescale,  
69 the neocortex integrates new memories, a form of consolidation termed “systems-level” [6]. The precise  
70 timeframe of this process is unknown. A related long-standing debate which has contributed to this  
71 uncertainty is whether or not the hippocampus ever relinquishes its role in autobiographical memory  
72 retrieval. One theory asserts that the hippocampus is not involved in the retrieval of memories after  
73 they have become fully consolidated to the neocortex [7]. Alternate views maintain that vivid, detailed  
74 autobiographical memories retain a permanent reliance on the hippocampus for their expression [8-12].

75 An undisputed feature of systems-level consolidation, however, is the strengthening of neural  
76 representations in the neocortex over time. Clarity on the time course of systems-level consolidation is  
77 therefore more likely to be achieved through scrutiny of its neocortical targets. While theoretical  
78 accounts often fail to specify these cortical locations, animal experiments have consistently implicated  
79 the medial prefrontal cortex. While this region has been associated with the formation [13, 14] and  
80 recall of recently acquired memories [15-17], in rodents it appears to be disproportionately involved in  
81 the retrieval of memories learned weeks previously [18-26]. The dependency on this region, which  
82 emerges over time, is facilitated by post-learning activation [27] and structural changes [28-30].

83 The evolutionary expansion of prefrontal cortex in humans makes it challenging to make direct  
84 anatomical comparisons with rodents, but the ventromedial prefrontal cortex (vmPFC) has been  
85 proposed as a homologous site of long-term memory consolidation [31]. It may appear surprising that an  
86 association between impaired autobiographical memory retrieval and vmPFC lesions has only recently  
87 started to be more precisely characterised [32]. However, there are a number of confounding factors in

88 this field [33] - non-selectivity of vmPFC lesions, methodological differences in memory elicitation, and  
89 the tendency of patients with vmPFC damage to recollect events which have never occurred, a  
90 phenomenon known as confabulation [34].

91 Numerous functional MRI (fMRI) studies of vmPFC activity during autobiographical memory  
92 recall have been conducted, but with inconclusive results. Delay-dependent increases in retrieval-related  
93 activity have been observed in some studies [35, 36] but not others [37-39]. Autobiographical memory in  
94 particular induces robust vmPFC engagement [40] but it is unclear whether this activity increases [41],  
95 decreases [42], or remains constant in accordance with memory remoteness [43-52].

96 A powerful method of fMRI analysis which can help to bridge the empirical gap between the  
97 human and animal literatures is multi-voxel pattern analysis (MVPA), due to its increased sensitivity to  
98 specific neural representations [53]. Using this approach, Bonnici et al. [54] demonstrated that remote  
99 10 year old autobiographical memories were more detectable in the vmPFC than recent two week old  
100 autobiographical memories, consistent with its proposed role as a long-term consolidation site. This  
101 difference was not apparent in other cortical areas, nor did it emerge from a standard univariate  
102 analysis. A follow up study two years later with the same participants and memories, demonstrated that  
103 the original two week old memories were now as detectable in the vmPFC as the remote memories [55].  
104 This suggested the recent memories had been fully consolidated in the vmPFC after just two years, and  
105 perhaps even sooner.

106 The identification of this two year time window represented an opportunity to resolve the time  
107 course of systems-level consolidation with high precision. To do so, we sampled memories from four  
108 month intervals spanning a two year period, and compared their neural representations using fMRI. As  
109 opposed to the pattern classification approach employed by Bonnici et al. [54] to decode the neural  
110 signatures of individual memories, we used Representational Similarity Analysis (RSA) [56]. This method  
111 compares the consistency of neural patterns across repetitions of a single memory, against all other  
112 unrelated memories, to detect its unique informational content in a region of interest. Differences in the  
113 strength of memory representations across time periods were interpreted as delay-dependent

114 engagement of the vmPFC. To verify observed time-sensitive differences, we followed the neural  
115 evolution of individual memories in a follow up study with the same participants and memories eight  
116 months later. The selection of numerous time-points characterised the consolidation process with  
117 unprecedented temporal resolution, while the longitudinal design was not only an opportunity to  
118 replicate these findings, but to observe systems-level consolidation in action.

119 Systems-level consolidation is generally assumed to be an incremental process, therefore, we  
120 considered a gradual linear trajectory of vmPFC recruitment as the most likely outcome. The alternative  
121 hypothesis was a rapid strengthening of vmPFC neural representations in the first few months after an  
122 event. The results conformed to neither scenario, and revealed an unexpected temporal relationship - a  
123 transient recruitment of the vmPFC beginning in the months following the initial experience, followed by  
124 an enduring signature of more remote memories. The second, longitudinal, experiment confirmed this  
125 finding. This is the first demonstration, to our knowledge, of such a temporal dissociation in vmPFC-  
126 mediated memory retrieval.

127

## 128 **Results**

### 129 **Experiment 1**

130 One week prior to the fMRI scan, with the assistance of personal photographs, participants (n=30)  
131 verbally recalled and rated the characteristics of autobiographical memories from eight time periods:  
132 memories that were 0.5 months old (0.5M, i.e., two week old memories), 4M, 8M, 12M, 16M, 20M, 24M  
133 and also 60M old – these latter memories serving as a definitive benchmark for remote (5 year old)  
134 memories (see Materials and methods, Fig 1A). Two memories from each time period which were  
135 sufficiently vivid, detailed, specific and unique in time and place were chosen for subsequent recall in the  
136 scanner. This meant that there were two full sets of memories. Participants created a short phrase  
137 pertaining to each autobiographical memory, which was paired with the photograph to facilitate recall  
138 during the subsequent fMRI scan.

139

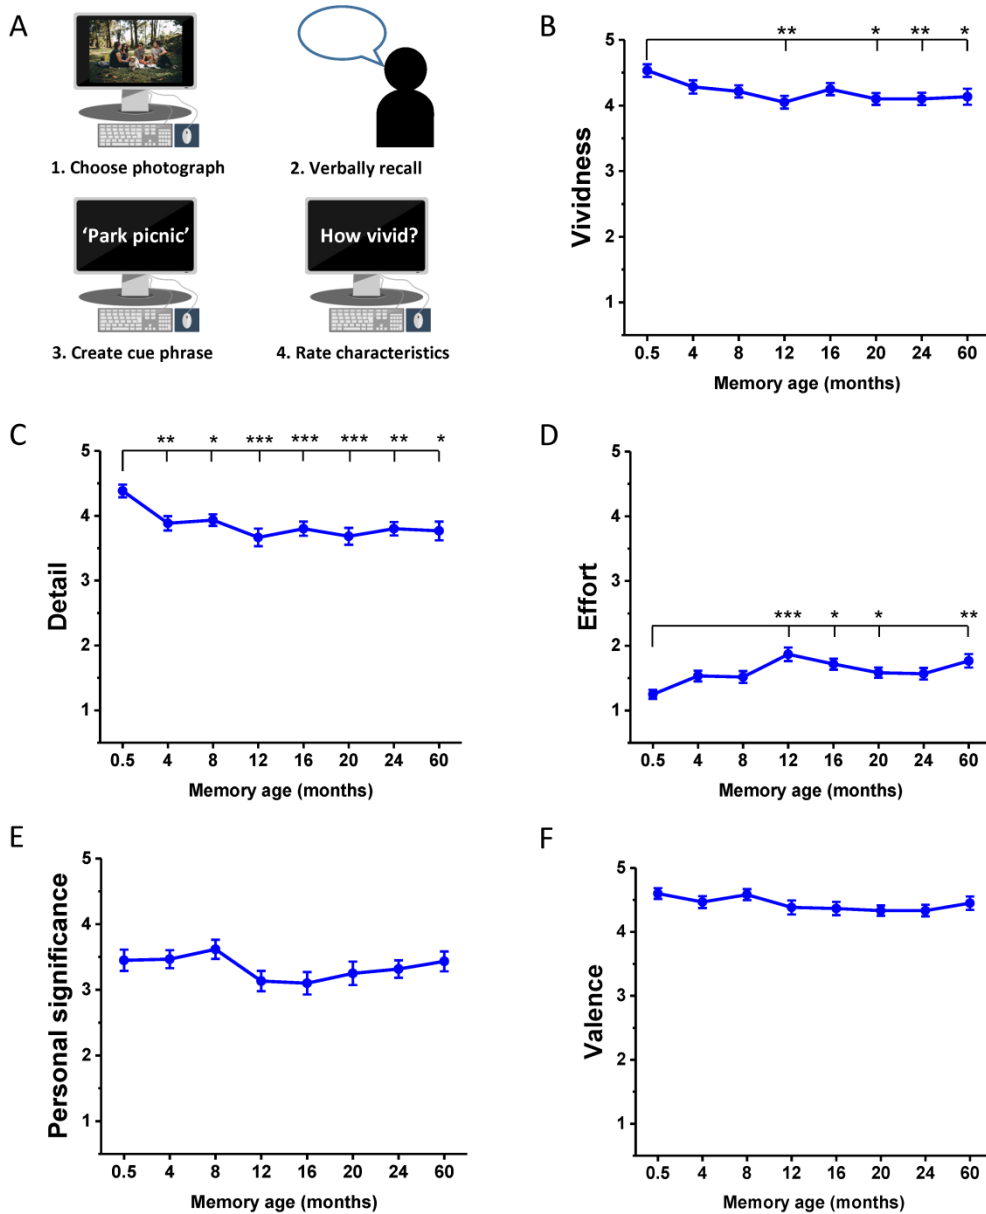

140

141 **Fig 1. Memory harvesting and subjective ratings.** (A) Schematic of the interview where the autobiographical  
 142 memories were harvested. Participants recalled a memory which was cued by a personal photograph, chose a  
 143 phrase to help remind them of this memory during the subsequent scanner task, and rated its characteristics. (B-F)  
 144 Subjective ratings (means +/- 1SEM; see also means and SDs in Table A in S1 Table, and S1 Data for individual  
 145 ratings across both sets of memories) of memory characteristics at each time period for Experiment 1, averaged  
 146 across the two sets of memories. Ratings were on a scale of 1 to 5, where 1 was low and 5 was high. For emotional  
 147 valence: 1-2 = negative, 3 = neutral, 4-5 = positive. \*  $p < 0.05$ , \*\*  $p < 0.01$ , \*\*\*  $p < 0.001$ .

148

### 149 **Comparable subjective recall phenomenology across memories**

150 While all memories satisfied the criteria of being vivid and detailed, and the ratings were high (Fig 1; see  
 151 means and SDs in Table A in S1 Table), subjective vividness nevertheless varied as a function of memory  
 152 age ( $F_{(7,203)} = 3.45$ ,  $p = 0.002$ ), with the most recent, 0.5M old, memories rated higher than 12M ( $t_{29} =$

153 4.08,  $p = 0.009$ ), 20M ( $t_{29} = 3.88$ ,  $p = 0.016$ ), 24M ( $t_{29} = 4.18$ ,  $p = 0.007$ ) and 60M old memories ( $t_{29} =$   
154 3.45,  $p = 0.049$ , Fig 1B). Subjective ratings of detail also differed across time-points ( $F_{(7,203)} = 5.74$ ,  $p <$   
155 0.001), once again the most recent 0.5M old memories were rated higher than 4M ( $t_{29} = 4.45$ ,  $p = 0.003$ ),  
156 8M ( $t_{29} = 3.97$ ,  $p = 0.012$ ), 12M ( $t_{29} = 5.00$ ,  $p < 0.001$ ), 16M ( $t_{29} = 4.96$ ,  $p < 0.001$ ), 20M ( $t_{29} = 5.37$ ,  $p <$   
157 0.001), 24M ( $t_{29} = 4.51$ ,  $p = 0.003$ ) and 60M old memories ( $t_{29} = 3.98$ ,  $p = 0.012$ , Fig 1C). The expenditure  
158 of effort during recall also varied according to remoteness of memories ( $F_{(7,203)} = 5.79$ ,  $p < 0.001$ ), with  
159 0.5M old memories being easier to recollect than 12M ( $t_{29} = -5.29$ ,  $p < 0.001$ ), 16M ( $t_{29} = -3.90$ ,  $p =$   
160 0.015), 20M ( $t_{29} = -3.67$ ,  $p = 0.027$ ) and 60M old memories ( $t_{29} = -4.55$ ,  $p = 0.003$ , Fig 1D). No significant  
161 difference was observed across time periods from 4M to 60M on any of these characteristics (all  $p >$   
162 0.05), nor did memories differ in their personal significance ( $F_{(7,203)} = 1.66$ ,  $p = 0.120$ , Fig 1E) or emotional  
163 valence ( $F_{(7,203)} = 1.51$ ,  $p = 0.166$ , Fig 1F) as a function of age.

164 In addition to these main ratings of interest, no difference was reported in the extent to which  
165 memories were recalled as active or static ( $F_{(7,203)} = 1.36$ ,  $p = 0.224$ ), or from a first or third person  
166 perspective ( $F_{(3,69,107.02)} = 1.09$ ,  $p = 0.365$ ) across time periods. The reported frequency at which  
167 memories were recalled since the original event (rated on a five point scale from “never” to “very  
168 frequently”), differed as a function of time ( $F_{(5,11,148.04)} = 4.36$ ,  $p < 0.001$ ), with the most recent 0.5M old  
169 memories thought about more frequently than 12M ( $t_{29} = 4.37$ ,  $p = 0.004$ ), 16M ( $t_{29} = 3.47$ ,  $p = 0.046$ ) and  
170 24M ( $t_{29} = 3.71$ ,  $p = 0.024$ ) old memories (see S11 Data for individual ratings for these characteristics).

171 Overall, therefore, memories were generally well matched on subjective phenomenological  
172 ratings, satisfied the criteria of high quality of memory recall, with only small differences observed for  
173 the most recent 0.5M old memories compared to the other autobiographical memories, as might be  
174 expected.

175

### 176 ***Consistent level of details recalled across memories***

177 To complement the subjective ratings of memory characteristics with a more objective assessment of  
178 their content, transcripts of participants’ memory interviews were scored using the Autobiographical



179 Interview protocol ([57]; Materials and methods). In total for this first experiment, 10,187 details were  
180 scored. The mean (SD) number of internal details (bound to the specific ‘episodic’ spatiotemporal  
181 context of the event) and external details (arising from a general ‘semantic’ knowledge or references to  
182 unrelated events) are shown in Table B in S1 Table (see also Fig 2). They were then compared across  
183 time periods. In contrast to the subjective ratings of memory detail, the number of details recalled  
184 across memories from different time periods displayed only a non-significant trend ( $F_{(4,54,131.66)} = 1.92$ ,  $p =$   
185  $0.101$ ). As expected, the number of internal and external details differed ( $F_{(1,29)} = 206.03$ ,  $p < 0.001$ ), with  
186 more internal details recalled for every time period (all  $p < 0.001$ ). No interaction between time period  
187 and type of detail was observed ( $F_{(7,203)} = 1.87$ ,  $p = 0.077$ ). While a more targeted contrast of the most  
188 recent (0.5M) and most remote (60M) memories did reveal that 0.5M events contained more internal  
189 details ( $t(29) = 3.40$ ,  $p = 0.002$ ), this is consistent with participants’ subjective ratings, and implies that  
190 any observed strengthening of neural representations over time could not be attributable to greater  
191 detail at remote time-points. The number of external details recalled was remarkably consistent across  
192 all time periods, emphasising the episodic nature of recalled events irrespective of remoteness. Inter-  
193 rater reliabilities for the scoring (see Materials and methods) were high for both internal (ICC = 0.94) and  
194 external (ICC = 0.81) details.

195

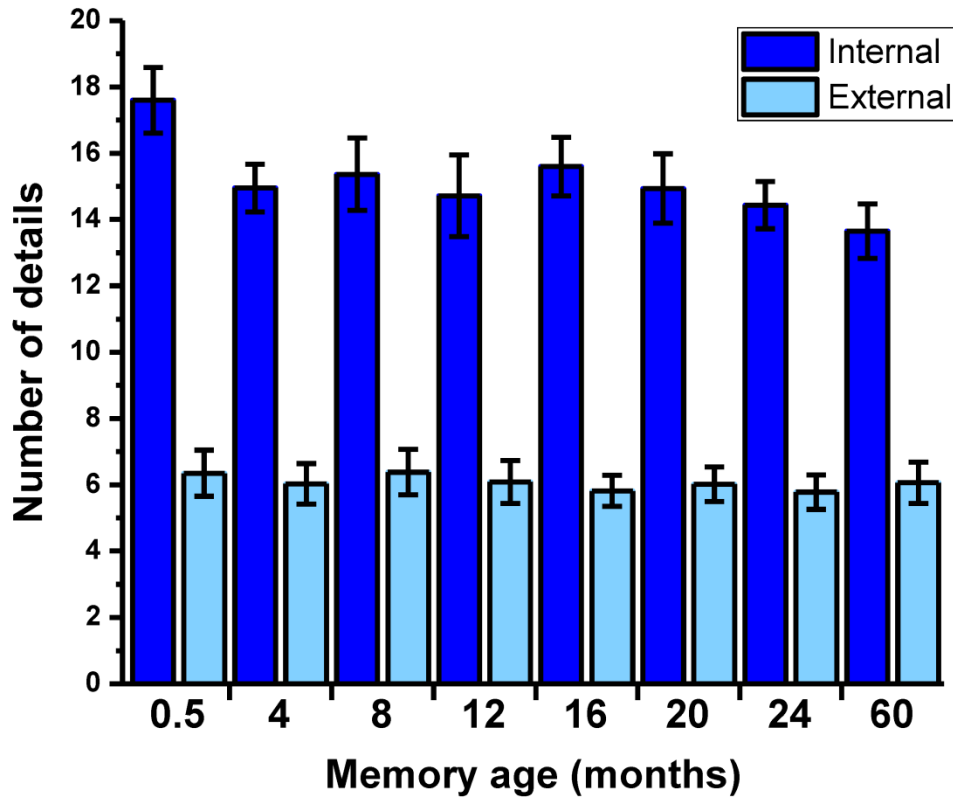

196  
197 **Fig 2. Objective scores for memory details.** The mean +/- 1SEM (see also means and SDs in Table B in S1 Table, and  
198 S2 Data for individual participant scores) number of internal and external details at each time period, averaged  
199 across the two sets of autobiographical memories.  
200

201 ***vmPFC engagement during recall was non-monotonic***

202 vmPFC was delineated as the ventral medial surface of the frontal lobe and the medial portion of the  
203 orbital frontal cortex [58]. This comprises areas implicated in memory consolidation [31, 54, 55], namely  
204 Brodmann Areas 14, 25, ventral parts of 24 and 32, the caudal part of 10 and the medial part of BA 11  
205 (Fig 3A, and Materials and methods).  
206

A

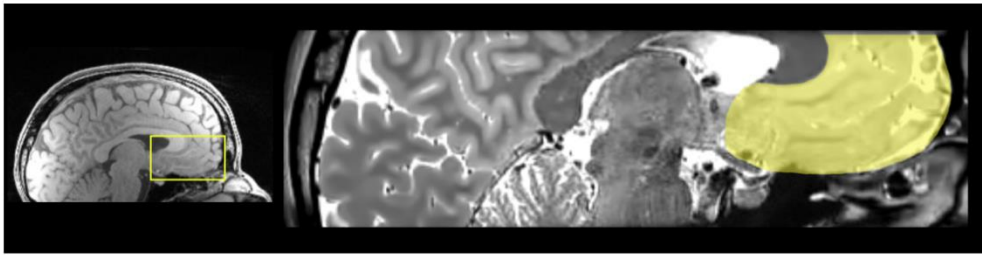

B

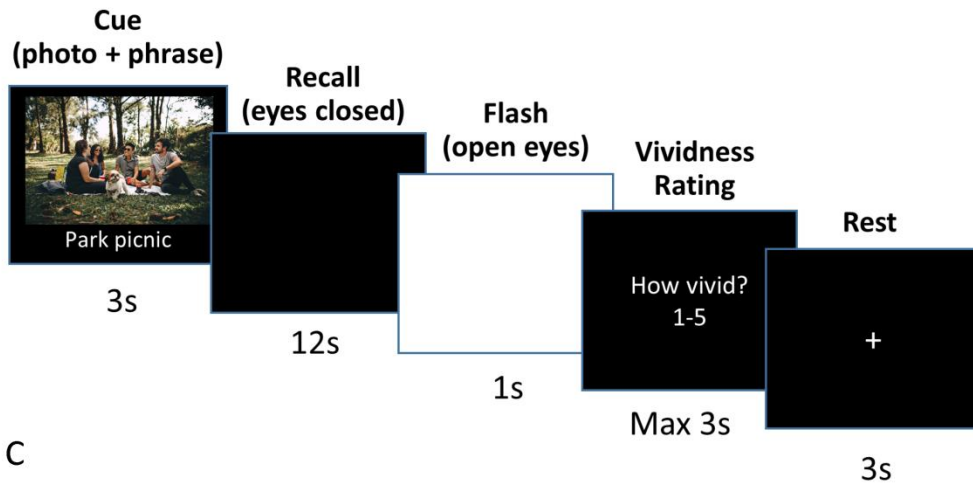

C

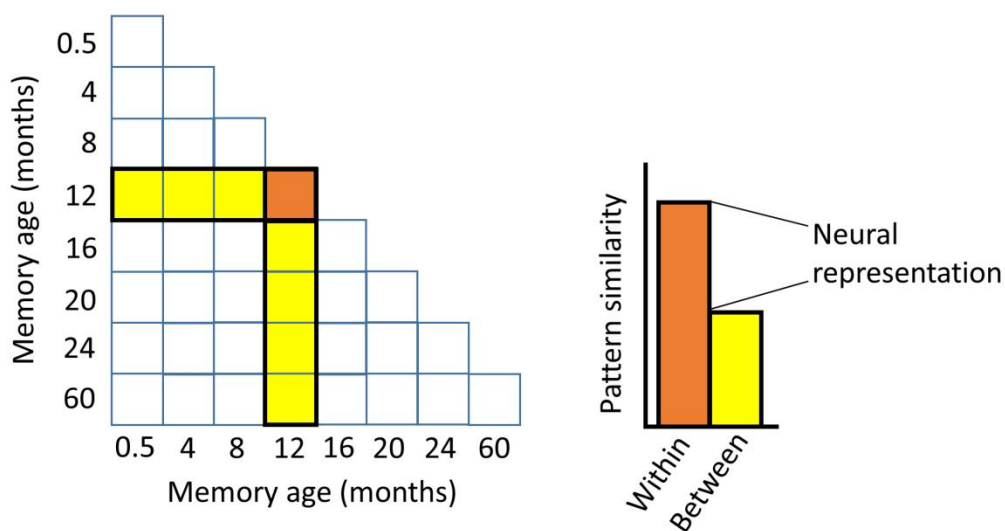

207

208 **Fig 3. Experimental details.** (A) The vmPFC is highlighted on an example participant's structural MRI scan. (B) The  
209 timeline of an example trial from the scanning task. (C) Graphical illustration of the neural representation score  
210 calculation using RSA. The neural pattern similarity across trials recalling the same memory (orange) minus the  
211 mean pattern similarity between that memory and other memories (yellow) generates a "neural representation"  
212 score. A score significantly higher than zero indicates a neural pattern distinct to that memory is present in the  
213 vmPFC.

214

215

216

On each trial, the photograph and associated pre-selected cue phrase relating to each event

217 were displayed on a screen for 3 seconds. Following removal of this cue, participants then closed their

218 eyes and recalled the memory. After 12 seconds, the black screen flashed white twice, to cue the  
219 participant to open their eyes. The participant was then asked to rate how vivid the memory recall had  
220 been using a five-key button box, on a scale of 1-5, where 1 was not vivid at all, and 5 was highly vivid  
221 (Fig 3B).

222 We used RSA to quantify the extent to which the strength of memory representations in the  
223 vmPFC differed as a function of memory age. This was achieved by contrasting the similarity of neural  
224 patterns when recalling the same memory with their similarity to other memories to yield a “neural  
225 representation” score for each memory (see Materials and methods, Fig 3C). As there were two  
226 memories recalled per time period, the neural representation scores were averaged to produce one  
227 value for that time period.

228 We anticipated an increase in the strength of memory representations at some point between  
229 0.5M and 24M, in line with the results of Bonnici and Maguire [55]. This is what we observed, where the  
230 most recent 0.5M memories were undetectable ( $t_{29} = 0.72$ ,  $p = 0.477$ ) in vmPFC, in contrast to the  
231 distinct neural signatures observed for 4M ( $t_{29} = 2.85$ ,  $p = 0.008$ ), 8M ( $t_{29} = 3.09$ ,  $p = 0.004$ ) and 12M ( $t_{29}$   
232  $= 3.66$ ,  $p < 0.001$ ) old memories (Fig 4A). These changes in the strength of memory representations were  
233 significant across time periods ( $F_{(7,203)} = 2.22$ ,  $p = 0.034$ ), with an observed increase in vmPFC recruitment  
234 from 0.5M to 8M ( $t_{29} = 2.07$ ,  $p = 0.048$ ) and 12M ( $t_{29} = -2.20$ ,  $p = 0.036$ ).

235

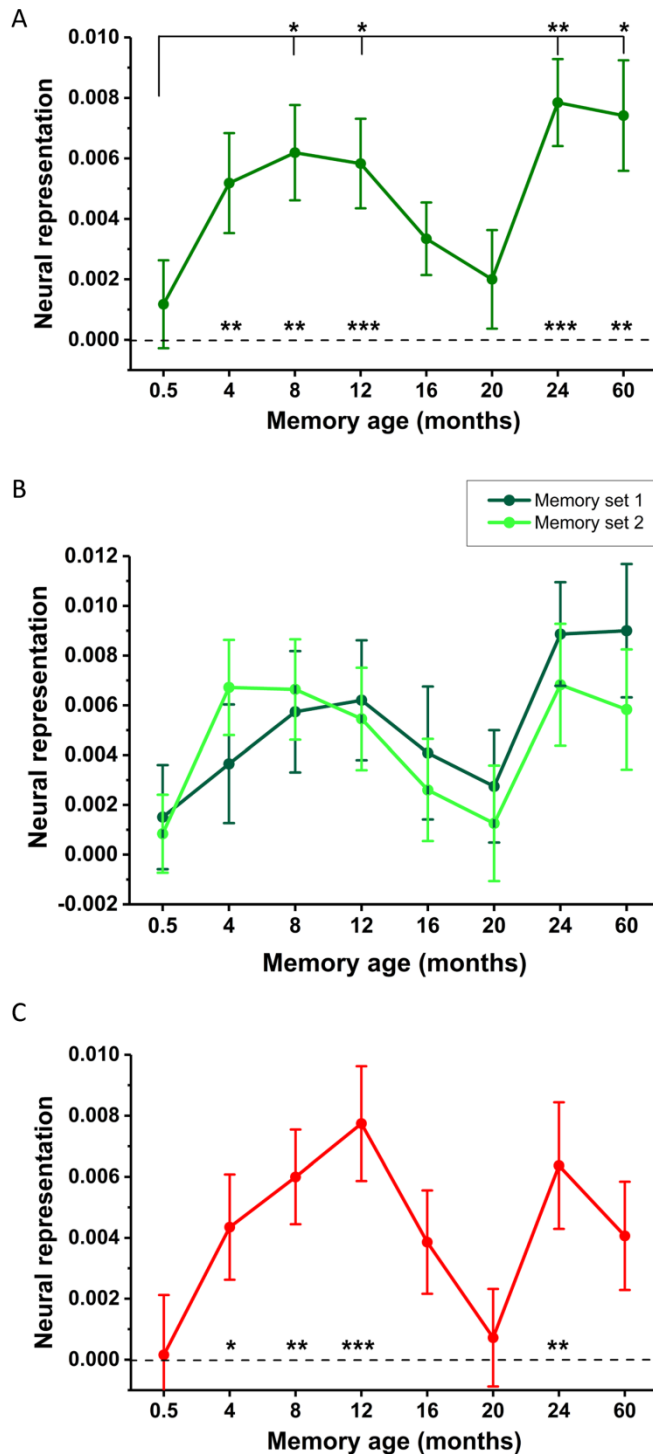

236

237 **Fig 4. fMRI results of Experiment 1.** (A) Mean +/- 1SEM neural representation scores at each time-point averaged  
238 across the two sets of memories. Asterisks above the dotted line indicate detectability of memories in vmPFC at  
239 each time-point. Asterisks above the solid line indicate significant increases in memory representations compared  
240 to the most recent (0.5M old) memories. \* p < 0.05, \*\* p < 0.01, \*\*\* p < 0.001. See S1 Fig for the underlying  
241 representational similarity matrix and S2 Fig for a boxplot distribution of these data. (B) Neural representation  
242 scores at each time-point plotted separately for the two sets of autobiographical memories. (C) Neural  
243 representation scores when using a single identically-aged memory as a baseline. See S3 Data for individual  
244 participant scores.  
245

246  
247           However, what was observed for the following two time periods was unexpected – an apparent  
248 disengagement of the vmPFC over the next eight months as we observed weak detectability of memory  
249 representations in vmPFC for 16M ( $t_{29} = 1.85$ ,  $p = 0.074$ ) and 20M ( $t_{29} = 1.03$ ,  $p = 0.310$ ) old memories.  
250 Neither 16M ( $t_{29} = -1.06$ ,  $p = 0.298$ ) nor 20M memories ( $t_{29} = -0.40$ ,  $p = 0.691$ ) were more strongly  
251 represented than the recent 0.5M old memories. In contrast, the more remote 24M ( $t_{29} = 4.34$ ,  $p <$   
252  $0.001$ ) and 60M ( $t_{29} = 3.55$ ,  $p = 0.001$ ) memories were detectable in the vmPFC, and significantly more so  
253 than the most recent memories (24M vs 0.5M,  $t_{29} = -2.93$ ,  $p = 0.007$ ; 60M vs 0.5M,  $t_{29} = -2.54$ ,  $p = 0.017$ )  
254 as well as the more temporally proximal 20M old memories (24M vs 20M,  $t_{29} = -2.50$ ,  $p = 0.018$ ; 60M vs  
255 20M,  $t_{29} = -2.32$ ,  $p = 0.028$ ).

256           The experimental design afforded us the opportunity to verify this non-monotonic pattern. As  
257 we sampled two memories per time-point, this time-dependent pattern should be evident in both sets  
258 of memories. As shown in Fig 4B, the two sets of memories followed a similar time-course of changes in  
259 representation within vmPFC. This is a compelling replication, given that the two memories from each  
260 time-period were unrelated in content as a prerequisite for selection, recalled in separate sessions in the  
261 scanner and analysed independently from each other.

262           The availability of two memories at each time-point also permitted the use of an alternative  
263 approach to calculating neural representation scores. Instead of using the similarity to memories from  
264 other time-points as a baseline, we could also assess if memories were similar to their temporally  
265 matched counterpart in the other set. As can be seen in Fig 4C, the non-monotonic pattern is preserved  
266 even when just using one identically aged memory as a baseline. In other words, the distinguishable  
267 patterns are specific to each individual memory rather than attributable to general retrieval processes  
268 associated with any memory of the same age.

269           An alternative explanation for memory representation scores which decreased over time is that  
270 the neural patterns became increasingly similar to memories from other time-points, rather than less  
271 consistent across repetitions, perhaps again reflecting more general retrieval processes. However as

272 evident in S3 Fig, between-memory scores remained stable across all time-points, and did not differ in  
273 their statistical significance ( $F_{(5,24,152.02)} = 1.72, p = 0.13$ ). If anything, there was a slight trend for higher  
274 between-memory scores to accompany higher within-memory scores. Therefore, the detectability of  
275 neural representations appeared to be driven by consistent within-memory neural patterns.

276

### 277 ***The observed temporal relationship is unique to vmPFC***

278 Our main focus was the vmPFC, given previous work highlighting specifically this region's role in  
279 representing autobiographical memories over time [54, 55]. We also scanned within a partial volume (to  
280 attain high spatial resolution with a reasonable TR), so were constrained in what other brain areas were  
281 available for testing (see Materials and methods). Nevertheless, we examined the same brain areas as  
282 Bonnici et al. [54], Bonnici and Maguire [55], additionally including the precuneus, given its role in  
283 autobiographical memory retrieval [59], and in no case did we observe a significant change in memory  
284 detectability across time periods - entorhinal/perirhinal cortex ( $F_{(7,203)} = 1.55, p = 0.154$ ), hippocampus  
285 ( $F_{(7,203)} = 0.98, p = 0.445$ ), posterior parahippocampal cortex ( $F_{(7,203)} = 1.41, p = 0.202$ ), retrosplenial cortex  
286 ( $F_{(7,203)} = 0.69, p = 0.682$ ), temporal pole ( $F_{(7,203)} = 1.78, p = 0.093$ ), lateral temporal cortex ( $F_{(4.86,141.03)} =$   
287  $0.68, p = 0.636$ ) or precuneus ( $F_{(7,203)} = 0.789, p = 0.562$ ). Of note, memories which were undetectable in  
288 the vmPFC were still represented in other brain regions at these time points (see S2 Table for neural  
289 representation score means and SDs, and S13 Data for individual participant scores). For example, 20  
290 month old memories which did not appear to recruit the vmPFC during retrieval were represented in the  
291 majority of other regions comprising the core autobiographical memory network (precuneus, lateral  
292 temporal cortex, parahippocampal cortex, and approaching significance in the retrosplenial cortex ( $t_{29} =$   
293  $1.83, p = 0.08$ )).

294 Following scanning, participants completed three additional ratings. They were asked to  
295 indicate the extent to which the memories were changed by the 6 repetitions during scanning on a scale  
296 ranging from 1 (not at all) to 5 (completely). They reported that the memories were not changed very  
297 much by repetition (mean: 2.61, SD: 0.74). They were also asked how often during scanning they

298 thought about the memory interview one week previous on a scale of 1 (not at all) to 5 (completely),  
299 with participants indicating they rarely thought about the interview (mean: 2.29, SD: 1.01). Finally,  
300 participants were asked the extent to which the recall of memories from each time period unfolded in a  
301 consistent manner over the course of the session. A difference was observed ( $F_{(7,203)} = 2.78$ ,  $p = 0.009$ ),  
302 with the most recent 0.5M old memories being rated as more consistently recalled than the most  
303 remote 60M memories ( $t_{29} = 3.97$ ,  $p = 0.012$ ).

304 In addition to the region of interest (ROI)-based approach, a searchlight analysis was also  
305 conducted in MNI group normalised space to localise areas within the vmPFC where memories displayed  
306 high detectability across participants (see Materials and methods). We discovered a significant bilateral  
307 cluster of 652 voxels (see Fig A in S4 Fig), and subsequently used RSA to quantify the strength of neural  
308 representations at each time-point within this area (see Fig B in S4 Fig). The results were highly similar to  
309 the whole-ROI analysis in native space, suggesting the main result may be driven by more spatially  
310 confined activity within the vmPFC. However a searchlight approach is sub-optimal to answer the  
311 current research question, as it requires an *a priori* model RSM against which to compare the neural  
312 patterns at each searchlight sphere, whereas the ROI approach makes no such assumptions.

313 We also conducted a standard mass-univariate analysis on the whole volume with memory  
314 remoteness as a parametric regressor, and no area displayed either a significant increase or decrease in  
315 activity in accordance with memory age, consistent with the findings of Bonnici et al. [54]. In a similar  
316 parametric analysis, we did not find evidence of the modulation of univariate activity by in-scanner  
317 vividness ratings as might be suggested by the findings of Sheldon and Levine [60], however, all  
318 memories chosen for the current study were highly vivid in nature.

319 One concern when studying covert cognitive processes such as autobiographical memory in the  
320 fMRI scanner is participant compliance, because performance is subjectively reported rather than  
321 objectively assessed. However if participants were complying with task demands, there should be an  
322 association between in-scanner subjective ratings and the detectability of neural representations. When  
323 non-vivid trials were additionally incorporated into the RSA analysis, the mean memory representation



324 score in the vmPFC for all participants averaged across time-points decreased from 0.0049 (SD 0.005) to  
325 0.0044 (SD 0.005). In fact, the deleterious effect of including these extra non-vivid trials was evident in  
326 24 out of the 30 participants. Such a consistent relationship between participants' subjective ratings of  
327 their own memory performance and the sensitivity of the RSA analysis to detect memory  
328 representations, strongly suggests participants were performing the task as instructed.

329

### 330 **Rationale and predictions for Experiment 2**

331 The non-monotonic pattern we observed in the fMRI data did not manifest itself in the subjective or  
332 objective behavioural data. In fact, the only difference in those data was higher ratings for the most  
333 recent 0.5M old memories. However, these were paradoxically the most weakly represented memories  
334 in the vmPFC, meaning the neural patterns were not driven by memory quality. The objective scoring of  
335 the memories confirmed comparable levels of detail provided for all memories, without any significant  
336 drop in episodic detail or increase in the amount of semantic information provided as a function of time.  
337 Therefore, the amount or nature of the memory details were not contributing factors.

338         Nevertheless, to verify that the results genuinely represented the neural correlates of memory  
339 purely as a function of age, one would need to study the effects of the passage of time on the individual  
340 neural representations. Therefore we invited the participants to revisit eight months later to recall the  
341 same memories again both overtly and during scanning; 16 of the participants agreed to return. In order  
342 to generate specific predictions for the neural representations during Experiment 2, we took the actual  
343 data for the 16 subjects from Experiment 1 who returned eight months later (Fig 5 green line, where the  
344 non-monotonic pattern is still clearly evident), and shifted it forwards by two time-points to simulate the  
345 expected pattern eight months later (Fig 5 pink dotted line). Note that for the 28M and 32M time  
346 periods in Experiment 2 we assumed they would have the same level of detectability as 24M old  
347 memories given the absence of data relating to these time periods from Experiment 1. We further  
348 assumed the neural representations between 60M and 68M would be unchanged.

349

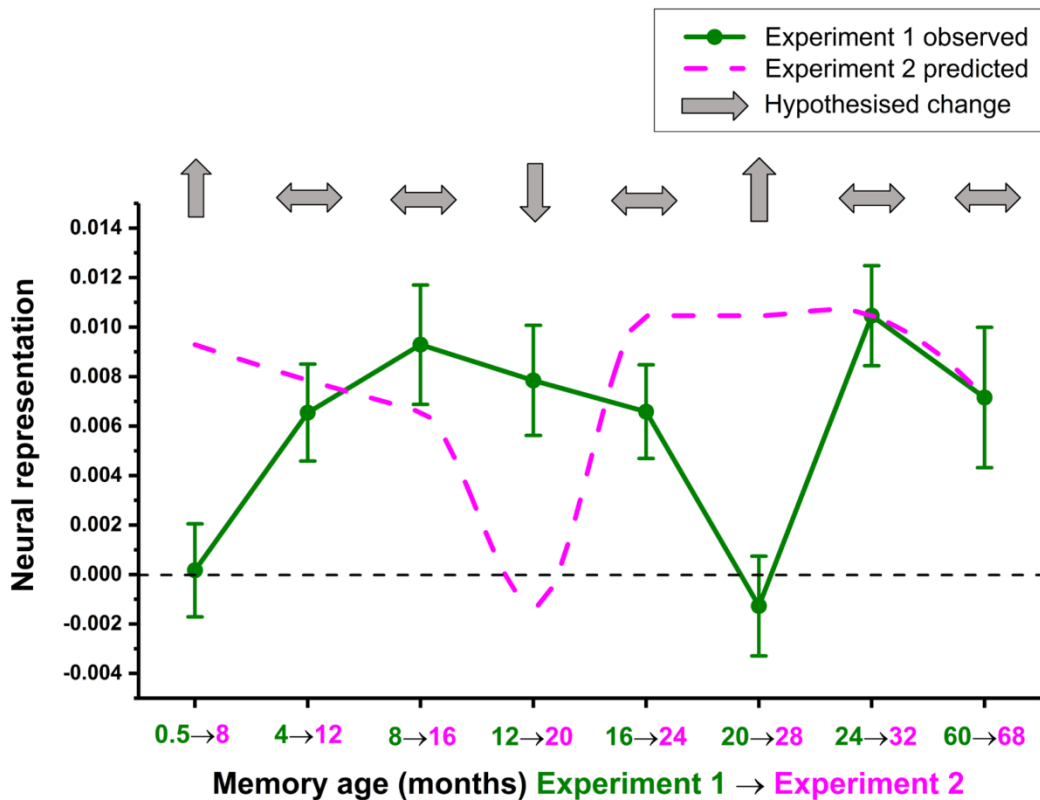

350

351 **Fig 5. Predicted fMRI changes eight months later in Experiment 2.** Predicted changes in the neural representations  
352 of individual autobiographical memories after eight months (pink dotted line), based on shifting the original  
353 observed data forward by two time-points for the 16 participants from Experiment 1 (green line) who returned for  
354 Experiment 2 (see S4 Data for original and predicted values). Light grey arrows indicate the hypotheses.

355

356

357 A comparison of the original and simulated neural representation scores yielded a number of  
358 clear hypotheses about how memory representations would change over time in the vmPFC. Two week  
359 old memories should become detectable eight months later, while the original 4M and 8M old memories  
360 should not differ in their representational strength. Twelve month old memories from Experiment 1  
361 should be significantly less detectable, whereas 16M old memories should remain unchanged. The  
362 original 20M old memories should be better represented at 28M, whereas the 24 and 60 month old  
363 memories from Experiment 1 were not predicted to change over time.

364

365

366

367 **Experiment 2 (eight months later)**

368 One week prior to the fMRI scan, with the assistance of the personal photographs and previously chosen  
369 phrases which were used as cues in Experiment 1, the participants verbally recalled and rated the  
370 characteristics of their autobiographical memories just as they had done eight months previously (see  
371 Materials and methods and Fig 6A).

372

373

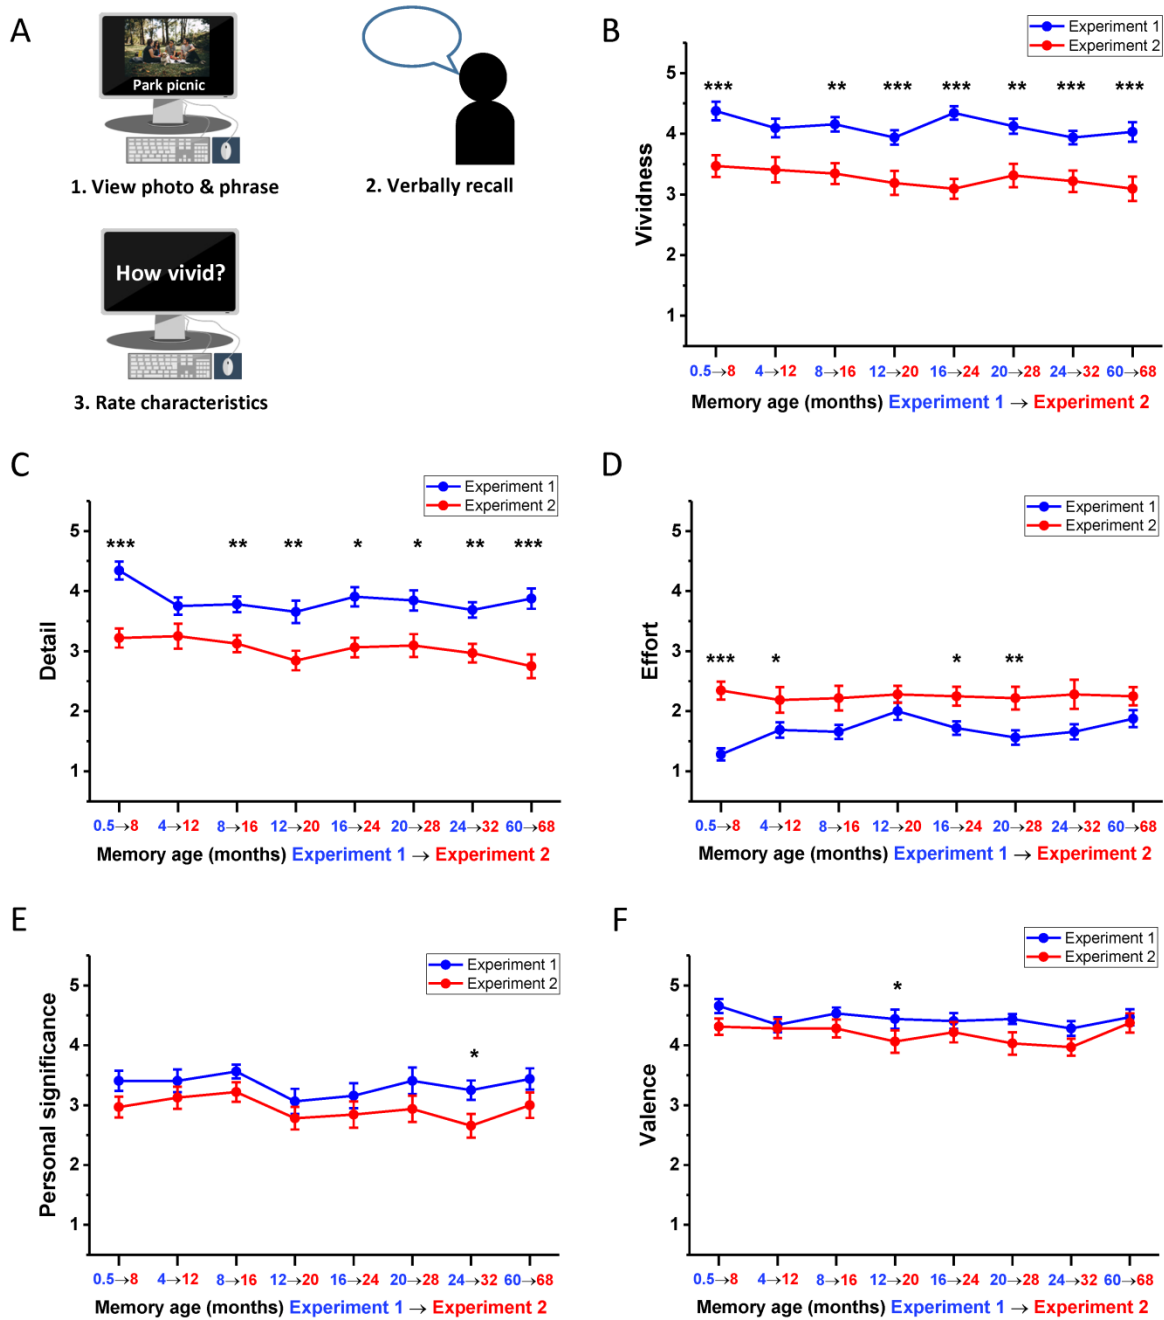

374

375 **Fig 6. Memory recall and subjective ratings.** (A) Schematic of the interview where participants recalled an  
 376 autobiographical memory using their previously chosen photograph and cue phrase and rated its characteristics.  
 377 (B-F) Subjective ratings (means +/- 1SEM; see also means and SDs in Table A in S1 Table and Table A in S3 Table) of  
 378 memory characteristics at each time period for Experiment 1 (blue line, n=16 participants) and how the ratings of  
 379 the same memories differed eight months later during Experiment 2 (red line, the same n=16 participants)  
 380 averaged across the two sets of memories in both cases (see S5 Data for individual ratings across both sets of  
 381 memories). Ratings were on a scale of 1 to 5, where 1 was low and 5 was high. For emotional valence: 1-2 =  
 382 negative, 3 = neutral, 4-5 = positive. Asterisks indicate significant differences in memory ratings between  
 383 Experiments 1 and 2; \* p < 0.05, \*\* p < 0.01, \*\*\* p < 0.001.  
 384

385

386 ***Subjective ratings of phenomenology remain equivalent across memories***

387 Means and SDs are provided in Table A in S3 Table. Autobiographical memories recalled during  
388 Experiment 2 did not differ across time periods on vividness ( $F_{(7,105)} = 0.83$ ,  $p = 0.564$ ), detail ( $F_{(7,105)} =$   
389  $1.30$ ,  $p = 0.257$ ), effort ( $F_{(7,105)} = 0.11$ ,  $p = 0.998$ ), personal significance ( $F_{(7,105)} = 1.49$ ,  $p = 0.180$ ), valence  
390 ( $F_{(7,105)} = 1.06$ ,  $p = 0.397$ ), viewpoint ( $F_{(3.42,51.22)} = 1.24$ ,  $p = 0.31$ ) or motion ( $F_{(3.95,59.32)} = 1.43$ ,  $p = 0.237$ ).  
391 When asked how frequently they had thought about the autobiographical memories in the eight months  
392 between experiments (rated on a five point scale from “never” to “very frequently”), participants  
393 reported some change across time periods ( $F_{(7,105)} = 3.04$ ,  $p = 0.006$ ). However, the only significant  
394 difference between time periods was a lower recall frequency for now 32M old memories compared to  
395 the now 12M ( $t_{15} = 3.87$ ,  $p = 0.042$ ). Given the range of responses to this question across conditions  
396 (1.50-2.03), clearly participants had not given the memories much thought in the intervening eight  
397 months. Therefore, all memories recalled in Experiment 2 were extremely well matched in terms of their  
398 phenomenology, which reflects the consistency observed in ratings from eight months onwards in  
399 Experiment 1.

400 There were, however, differences in the absolute values of subjective ratings between the two  
401 experiments. There was a decrease in the reported vividness of all memories from Experiment 1 to  
402 Experiment 2 ( $F_{(1,15)} = 88.45$ ,  $p < 0.001$ ), from 0.5M to when they were 8M old ( $t_{15} = 6.21$ ,  $p < 0.001$ ), 8M  
403 to 16M ( $t_{15} = 4.21$ ,  $p = 0.006$ ), 12M to 20M ( $t_{15} = 5.48$ ,  $p < 0.001$ ), 16M to 24M ( $t_{15} = 7.07$ ,  $p < 0.001$ ), 20M  
404 to 28M ( $t_{15} = 4.10$ ,  $p = 0.008$ ), 24M to 32M ( $t_{15} = 5.97$ ,  $p < 0.001$ ) and 60M to 68M ( $t_{15} = 5.33$ ,  $p < 0.001$ ;  
405 Fig 6B). A comparable change was observed in the subjective impression of memory detail recalled  
406 following the eight month interlude ( $F_{(1,15)} = 126.81$ ,  $p < 0.001$ ), with a drop from 0.5M to 8M ( $t_{15} = 6.26$ ,  
407  $p < 0.001$ ), 8M to 16M ( $t_{15} = 4.03$ ,  $p = 0.009$ ), 12M to 20M ( $t_{15} = 4.78$ ,  $p = 0.002$ ), 16M to 24M ( $t_{15} = 3.72$ ,  
408  $p = 0.016$ ), 20M to 28M ( $t_{15} = 3.67$ ,  $p = 0.018$ ), 24M to 32M ( $t_{15} = 4.55$ ,  $p < 0.003$ ) and 60M to 68M ( $t_{15} =$   
409  $9.67$ ,  $p < 0.001$ ; Fig 6C). Recalling memories eight months later was also perceived as more effortful  
410 ( $F_{(1,15)} = 43.32$ ,  $p < 0.001$ ), from 0.5M to 8M ( $t_{15} = -7.81$ ,  $p < 0.001$ ), 4M to 12M ( $t_{15} = -3.30$ ,  $p = 0.039$ ),

411 16M to 24M ( $t_{15} = -1.95$ ,  $p = 0.021$ ), and 20M to 28M ( $t_{15} = -4.03$ ,  $p = 0.009$ ; Fig 6D). The elapsed time  
412 between experiments also led to a reduction in the reported personal significance of memories ( $F_{(1,15)} =$   
413  $11.82$ ,  $p = 0.004$ ), from 24M to 32M ( $t_{15} = 3.58$ ,  $p = 0.022$ ; Fig 6E). Ratings of emotional valence also  
414 changed over the eight month period ( $F_{(1,15)} = 9.78$ ,  $p = 0.007$ ), with a reported attenuation of the  
415 positivity of memories from 12M to 20M ( $t_{15} = 3.87$ ,  $p = 0.012$ ; Fig 6F). In addition to these main ratings,  
416 no difference was reported in the extent to which memories were recalled from a first or third person  
417 perspective ( $F_{(1,15)} = 0.513$ ,  $p = 0.485$ ) over the eight month period. The extent to which memories were  
418 recalled as active or static was altered by the passage of time between experiments ( $F_{(1,15)} = 11.01$ ,  $p =$   
419  $0.005$ ), with the original 0.5M old memories becoming more static when 8M old ( $t_{15} = -3.42$ ,  $p = 0.031$ ).  
420 See S12 Data for individual ratings for these characteristics.

421         Despite the observed changes in some subjective ratings from Experiment 1 to Experiment 2,  
422 they were unidirectional across all time periods. As such, if the pattern of hypothesised emergence and  
423 disappearance of neural representations in vmPFC were to be supported in Experiment 2, then it could  
424 not be accounted for by changes in subjective ratings. Additionally, although the changes in subjective  
425 ratings across time tend to suggest a comparable degradation in memory quality across all time periods,  
426 this may be misleading. The ratings overall were still high, and these absolute changes in values could be  
427 influenced by participants' expectations of their ability to recall memories after an extended period of  
428 time with high fidelity, because the objective scoring of memory detail revealed no such pattern, as we  
429 report in the next section.

430

#### 431 ***A similar level of detail was recalled across experiments***

432 As with Experiment 1, transcripts of participants' memory interviews during Experiment 2 were scored  
433 using the Autobiographical Interview protocol ([57]; see Materials and methods)). A total of 6,444  
434 details were scored (see Table B in S3 Table for means, SD). There was a difference in the number of  
435 details recalled across different time periods in Experiment 2 ( $F_{(7,105)} = 2.49$ ,  $p = 0.021$ ). However, this  
436 difference was only observed for external details ( $F_{(7,105)} = 3.25$ ,  $p = 0.004$ ), with more provided for 28M

437 memories than 12M memories ( $t_{15} = -4.68$ ,  $p = 0.008$ ). As with Experiment 1, the number of internal and  
438 external details differed ( $F_{(1,15)} = 72.57$ ,  $p < 0.001$ ), with more internal details recalled for every time  
439 period (all  $p < 0.01$ ). No interaction between time period and type of detail was observed ( $F_{(7,105)} = 0.87$ ,  
440  $p = 0.530$ ).

441 When the objective scores for both experiments were compared, no significant difference was  
442 observed in the overall number of details provided eight months later ( $F_{(1,15)} = 1.93$ ,  $p = 0.185$ ; Fig 7).  
443 Furthermore, there was no significant interaction between experiment and time period ( $F_{(1,15)} = 1.97$ ,  $p =$   
444  $0.066$ ), indicating that the amount of details provided for memories from any particular time period in  
445 Experiment 1 were not affected by the passage of time. Finally, no interaction was observed between  
446 experiment and type of detail provided ( $F_{(1,15)} = 2.27$ ,  $p = 0.153$ ), showing that the ratio of internal to  
447 external details was preserved across experiments.

448

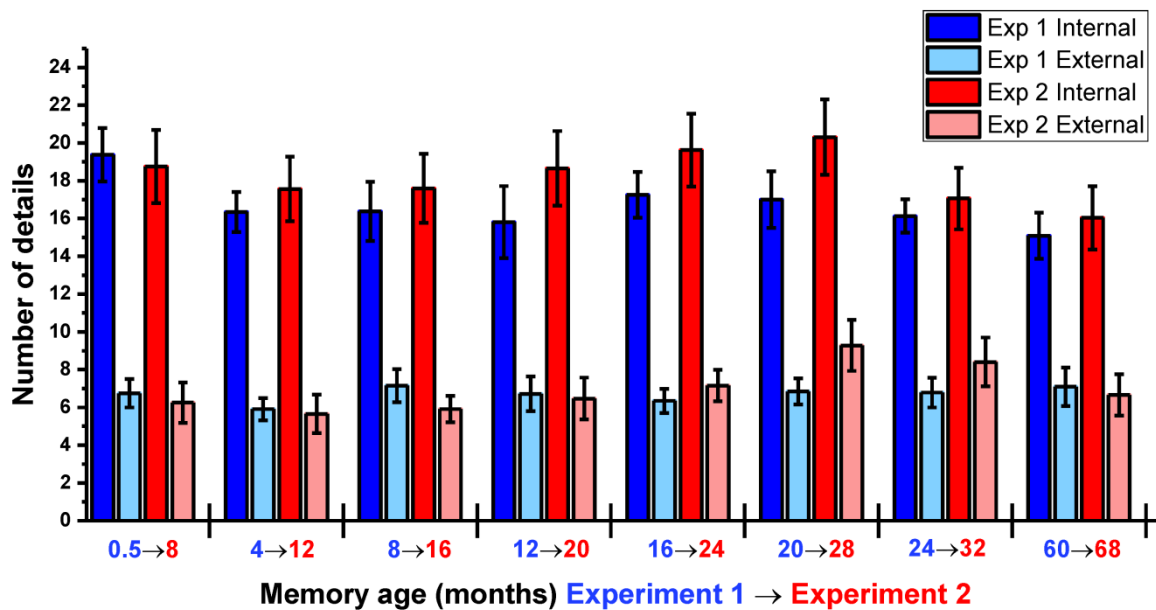

449  
450

451 **Fig 7. Objective scores for memory details over time.** The mean  $\pm$  1SEM (see also means and SDs in Table B in S1  
452 Table and Table B in S3 Table) number of internal and external details at each time period for Experiment 1 (blue  
453 bars,  $n=16$  participants) and Experiment 2 (red bars, the same  $n=16$  participants), averaged across the two sets of  
454 autobiographical memories (see S6 Data for individual participant scores).

455  
456  
457  
458  
459  
460

461 ***vmPFC memory representations undergo the predicted time-dependent changes***

462 Participants were scanned in an identical fashion as Experiment 1 (see Materials and methods and Fig  
463 3B), and neural representation scores for memories from each time point were again calculated.

464 When comparing the neural representation scores of memories from the eight original time  
465 periods in Experiment 1 with those of the same memories eight months later during Experiment 2, a  
466 main effect for experiment ( $F_{(1,15)} = 2.35$ ,  $p = 0.146$ ), or time period ( $F_{(7,105)} = 1.18$ ,  $p = 0.323$ ), was not  
467 observed, however, an interaction between experiment and time period emerged ( $F_{(7,105)} = 3.46$ ,  $p =$   
468  $0.002$ ). Closer examination via our planned comparisons (Fig 8A) revealed that seven out of the eight  
469 predictions made on the basis of the Experiment 1 findings were supported (Fig 8B). The original 0.5M  
470 old memories had increased in their representational strength in vmPFC eight months later ( $t_{15} = -1.84$ ,  $p$   
471  $= 0.043$ ), while the neural representation scores of the 4M and 8M old memories were essentially  
472 unchanged at 12M ( $t_{15} = 0.43$ ,  $p = 0.677$ ) and 16M ( $t_{15} = 1.22$ ,  $p = 0.242$ ) respectively. As expected, the  
473 original 12M old memories from Experiment 1 were eight months later more poorly represented in  
474 vmPFC when 20M months old ( $t_{15} = 1.85$ ,  $p = 0.042$ ). The original 16M old memories were unchanged in  
475 their representational strength at 24M ( $t_{15} = 1.38$ ,  $p = 0.187$ ), while 20M old memories were significantly  
476 more detectable in vmPFC at 28M ( $t_{15} = -2.69$ ,  $p = 0.008$ ). The most remote 60M memories did not differ  
477 in their neural representation scores eight months later ( $t_{15} = 0.86$ ,  $p = 0.402$ ). In fact the only finding  
478 which was inconsistent with the predictions generated by Experiment 1 was a decrease in the  
479 representation of 24M old memories when they were 32M of age ( $t_{15} = -2.69$ ,  $p = 0.009$ ). However, this  
480 prediction was based on the assumption that memories do not undergo further dynamic shifts in neural  
481 representation between two and five years, which may not be the case, and we did not have 32M data  
482 from Experiment 1 to corroborate this finding.

483



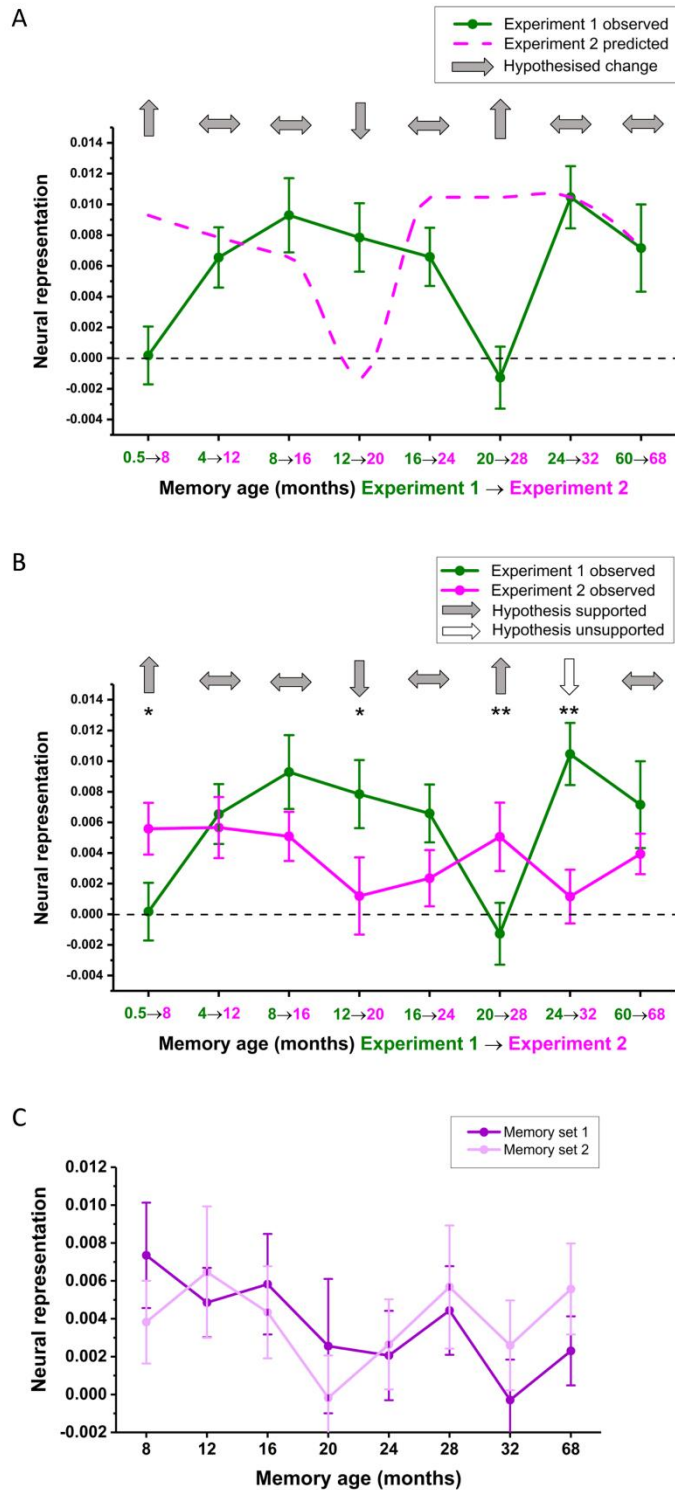

484

485 **Fig 8. fMRI results of Experiment 2.** (A) A reminder of the hypothesised changes in neural representations from  
 486 Experiment 1 (green line) to Experiment 2 (pink line, reprinted from Fig 5). (B) Mean +/- 1SEM neural  
 487 representation scores at each time-point averaged across the two sets of memories for Experiment 2 (pink line,  
 488 n=16 participants) compared to the same memories from eight months previously (green line, the same n=16  
 489 participants). Light grey and white arrows indicate supported and unsupported hypotheses respectively; \* p < 0.05,  
 490 \*\* p < 0.01. (C) Neural representation scores at each time-point for Experiment 2, plotted separately for the two  
 491 sets of autobiographical memories. See S7 data for individual participant scores.  
 492

493 For completeness, Fig 8C plots the neural representation scores for the two sets of memories in  
494 Experiment 2. As previously observed in Experiment 1, the two sets of memories displayed a similar  
495 time-course in terms of their neural representations, despite being recalled in separate scanning  
496 sessions, in a randomised order and analysed separately. As with Experiment 1, when examining other  
497 brain areas within the partial volume in Experiment 2, in no case did we find a significant difference in  
498 memory detectability across time periods.

499 Following scanning in Experiment 2, participants completed three additional ratings. They were  
500 asked to indicate the extent to which the memories were changed by the 6 repetitions during scanning  
501 on a scale ranging from 1 (not at all) to 5 (completely). As in Experiment 1, they reported that the  
502 memories were not changed very much by repetition (mean: 2.56, SD: 0.81). They were also asked how  
503 often they thought of the experience of recalling the memories in Experiment 1 while performing the  
504 scanning task in Experiment 2 on a scale of 1 (not at all) to 5 (during every memory). Participants  
505 indicated they rarely thought about Experiment 1 (mean: 1.75, SD: 0.93). Finally, the consistency of  
506 recall across time periods during the scanning session did not differ in Experiment 2 ( $F_{(7,105)} = 0.59$ ,  $p =$   
507  $0.761$ ) or between the two experiments ( $F_{(1,15)} = 0.12$ ,  $p = 0.733$ ; see also Table A in S1 Table and Table A  
508 in S3 Table).

509

## 510 **Discussion**

511 This study exploited the sensitivity of RSA to detect not only the extent to which memories of different  
512 ages were represented in the vmPFC, but how these representations changed over time. During  
513 Experiment 1, we observed detectability in vmPFC for memories at 4M to 12M of age, which was also  
514 evident at 24M and 60M. As expected, recent 0.5M old memories were poorly represented in vmPFC in  
515 comparison. Curiously, however, the same lack of detectability in vmPFC was observed for memories  
516 that were 16M to 20M old. This pattern persisted across separate sets of memories and was replicated  
517 in a follow-up study eight months later with the same participants and memories. Behavioural data  
518 failed to account for these time-dependent representational changes in either experiment and other

519 regions failed to show a significant change in memory representations over time. These findings are  
520 difficult to accommodate within any single theoretical account of long-term memory consolidation [9,  
521 12, 61-63], as neocortical recruitment is generally assumed to involve an ascending linear trajectory.  
522 Consolidation has been characterised as fluid and continuous [64], but the non-monotonic vmPFC  
523 engagement observed here suggests additional complexity in its temporal recruitment.

524

### 525 **Possible mechanisms underlying non-monotonic vmPFC recruitment**

526 Over the course of consolidation in this study, the vmPFC twice alternated between disengagement and  
527 engagement, indicative of four separate stages. Below we consider, based on the latest theoretical  
528 developments and empirical research on systems-level consolidation and vmPFC functioning, the time-  
529 dependent processes which could underlie such a non-monotonic pattern.

530

#### 531 ***Less than one month: quiescence during the early stages of systems-level consolidation***

532 During retrieval of memories less than one month of age, there was a notable absence of vmPFC  
533 recruitment. This is consistent with previous human studies showing weaker representations of recent  
534 memories using pattern classification [54], and lower overall levels of fMRI activity [41]. Similarly, in  
535 animals, prefrontal activation is reduced during recent memory recall [18, 19], with lesions of this region  
536 generally preserving recent memory retrieval [21, 24]. Although prefrontal cells may be ‘tagged’ for  
537 subsequent consolidation around the time of encoding [14], they remain functionally immature and do  
538 not appear to significantly contribute to memory retrieval at this stage [26].

539

#### 540 ***Four months to one year: disambiguation of competing consolidated representations***

541 Over the subsequent three time periods in this study, vmPFC memory representations progressively  
542 strengthened. This echoes the time-dependent increases in prefrontal cortex activity observed in animal  
543 studies during memory retrieval [19, 65], and the disruption of remote memory following prefrontal  
544 inactivation [19, 21, 24]. While it has been demonstrated that the interim replay of recent experiences in

545 the prefrontal cortex [66] coincides with lasting structural changes which facilitate subsequent recall  
546 [29], it is still unclear how these consolidated representations are utilised during retrieval. One  
547 prominent hypothesis is that the prefrontal cortex suppresses irrelevant representations [67], with  
548 corresponding evidence in animals that context-inappropriate memories are triggered following  
549 prefrontal inactivation [68]. Similarly in humans, vmPFC damage impairs the ability to suppress  
550 inappropriate memories through confabulation [34], and produces a tendency to confuse memories  
551 which have taken place in different contexts [69]. This is of potential relevance to the four to twelve  
552 month time period identified in the current study, as people remember vastly more memories from the  
553 past year than more remote life periods [70]. Therefore, the demands on memory disambiguation (the  
554 ability to correctly select from among similar memories during retrieval) are significantly increased  
555 across this timescale. For example, in attempting to recall the specific events from a party one attended  
556 months previously, multiple contemporaneous experiences which involve the same people, or have  
557 taken place in a similar context could interfere with recollection. While humans possess a large capacity  
558 for real-world stimuli in recent memory, an abundance of stored competing representations can be  
559 detrimental to memory performance during retrieval [71]. Therefore, vmPFC recruitment at these time-  
560 points may reflect a suppression of distractor representations which are inappropriate to the current  
561 retrieval intentions. Importantly, this would be a memory-specific process which would generate a  
562 consistent neural pattern every time a particular experience is recalled.

563

#### 564 ***Sixteen to 20 months: time-induced decay negates the need for disambiguation***

565 The progressive vmPFC disengagement observed over the following eight months suggests the  
566 suppression of interfering memories becomes less of a necessity over this period. Forgetting is a key  
567 attribute of an optimally functioning memory system [72], and the number of autobiographical events  
568 individuals can recall has been shown to decrease substantially between one and two years, before  
569 levelling off [73]. Therefore, the reduction in availability of potentially interfering memories from this  
570 time period may relieve the vmPFC from its role in disambiguating them from memories which have

571 persisted through the consolidation process. For example, one may return from a vacation with many  
572 memories which contain multiple overlapping features, but this will inevitably be reduced to a few  
573 distinct experiences as time goes on.

574

575 ***Two years to five years: the emergence of schematic representations***

576 If disambiguation ceases to be an issue for older memories, the robust re-engagement of vmPFC at more  
577 remote time periods suggests locally consolidated representations come to be used in a different way to  
578 assist in recall. From a theoretical perspective, systems-level consolidation is no longer viewed as the  
579 time-limited stabilisation of a static engram. Rather, the passage of time and repeated retrieval is  
580 thought to generate an additional representation which can complement the original detailed memory  
581 [10]. This emergent representation is schematic in nature, with an emphasis on general rather than  
582 specific details, and forms part of a flexible memory system which adapts to current demands. The  
583 network hub which supports schematic representations, suggested by both animal [17] and human  
584 neuroimaging [74] studies, is the medial prefrontal cortex. Further evidence is provided by patients with  
585 vmPFC lesions, who are resistant to false memory effects because schemas which would conflate  
586 actually studied and similar unseen words are not activated during retrieval [75]. Therefore, it is likely  
587 that the nature of memory representations in the vmPFC transform over the course of consolidation to  
588 become more schematic in nature. Accordingly, the re-engagement of vmPFC activity at more remote  
589 time-points in this study could point to the deployment of memory-congruent schema to assist in  
590 retrieval. For example, the vivid recollection of a memory from five years previously will likely require  
591 reorientation to an increasingly unfamiliar environment, an altered social network, and a different  
592 personal mindset. This may be facilitated by a rapid instantiation of relevant schematic representations  
593 in the vmPFC to bias retrieval in posterior brain regions, as proposed by Gilboa and Marlatte [76]. The  
594 non-monotonic recruitment observed here may, therefore, reflect not just the consolidation of neural  
595 representations, but their evolution over time and, most importantly, the way in which they are used to  
596 facilitate precise and holistic recollection. Importantly, vmPFC engagement during recall likely reflects

597 not just task-related recruitment, but also communication with the hippocampus and other neocortical  
598 regions.

599

### 600 **Relevance to systems-level consolidation theories**

601 The current findings have potential implications for the two dominant theoretical perspectives on  
602 systems-level consolidation. Standard Consolidation Theory [7] predicts that the passage of time  
603 promotes the strengthening of neural representations in the neocortex, but the duration of this process  
604 in humans is poorly specified. The current results suggest this process is accomplished over a relatively  
605 fast timescale on the order of months. The alternative perspective on consolidation, Multiple Trace  
606 Theory and Transformation Hypothesis [10], posits that over time, consolidation promotes the  
607 emergence of schematic, gist-like representations in the neocortex, which complement the original  
608 detailed memory. The re-engagement of the vmPFC at two years in this study may reflect the emergence  
609 of these generalised representations to facilitate specific recall at more remote time-points. Therefore,  
610 the consolidation of new memories in the neocortex may be reasonably rapid, whereas the  
611 transformation of these engrams may take place over a much longer timescale.

612

613 Using an autobiographical memory paradigm to study consolidation is preferable to laboratory-based  
614 episodic memory tests by virtue of its ecological validity, availability of temporally distant stimuli, clinical  
615 significance and context-dependent equivalence to animal tasks. However, studying autobiographical  
616 memory carries with it potential confounds which can affect interpretation of results. Below we consider  
617 why these factors cannot account for our observations.

618

### 619 **Consistency of recall and forgetting**

620 Older memories may yield a higher RSA score if they are more consistently recalled. Here, however,  
621 participants actually rated 0.5M memories as more consistently recalled than 60 month old memories.  
622 Older memories were not impoverished in detail when compared to the detail available for recent

623 memories. Moreover, an inspection of interview transcripts across experiments revealed participants  
624 rarely offered new details for previous memories when retested, countering the suggestion that  
625 increased detectability of old memories may arise from the insertion of new episodic or semantic details  
626 [77]. The consistency in recalled detail across experiments could be attributable to participants recalling  
627 in Experiment 2 what they had said during Experiment 1. However whether or not participants  
628 remembered by proxy is irrelevant, as they still recalled the specific details of the original event,  
629 removing forgetting as a potential explanation of changes in neural patterns over time.

630

### 631 **The influence of repetition**

632 Retrieving a memory initiates reconsolidation, a transient state where memories are vulnerable to  
633 interference [78, 79]. Therefore, repeated retrieval may cause this process to have an influence on  
634 neural representations. However, all memories were recalled one week before the fMRI scan, so if such  
635 an effect was present it would be matched across time-points. Retrieval at this stage may also accelerate  
636 consolidation [80], yet if this was a major influence, we would likely have found 0.5M memories to be  
637 more detectable than they were. Further repetition of memories within the scanner in Experiment 1  
638 took place over a timescale that could not affect consolidation processes or interpretation of the initial  
639 neural data. Nevertheless, this could arguably affect vmPFC engagement over a longer period of time  
640 [81] and thus perturb the natural course of consolidation, influencing the results of Experiment 2.  
641 However, given that seven out of the eight specifically hypothesised temporally sensitive changes in  
642 neural representations were supported, an altered or accelerated consolidation time-course appears  
643 highly unlikely. Again, recall recency was matched in Experiment 2 by the memory interview, and recall  
644 frequency between experiments was low.

645 Taking a more general and parsimonious perspective, the ratings demonstrate that, naturally, all  
646 memories are recalled on an occasional basis (Table A in S1 Table), therefore it seems highly unlikely  
647 that a mere six repetitions within a scanning session would significantly alter the time course of systems-  
648 level consolidation. It should also be noted that successful detection of neural patterns relied on the

649 specific content of each memory, rather than being due to generic time-related retrieval processes (S4  
650 Fig). One alternative to the current two-experiment longitudinal design to limit repetition across  
651 experiments would be to have a different group of participants with different memories for the second  
652 experiment. However the strength of the current approach was the ability to track the transformation in  
653 neural patterns of the same memories over time.

654

### 655 **The effect of selection**

656 An alternative interpretation of the time-sensitive vmPFC engagement is a systematic bias in the content  
657 of selected memories. For example, annual events coinciding across all participants, such as a seasonal  
658 holiday. However, recruitment took place over a period of five months in an evenly spaced manner,  
659 ensuring that such events did fall into the same temporal windows across participants. The occurrence  
660 of personal events such as birthdays was also random across participants. The use of personal  
661 photographs as memory cues also limited the reliance on time of year as a method for strategically  
662 retrieving memories. Furthermore, the nature of memory sampling was that unique, rather than generic,  
663 events were eligible, reducing the likelihood of events which were repeated annually being included.  
664 Memory detectability was high at 12 month intervals such as one, two and five years in this study,  
665 suggesting perhaps it is easier to recall events which have taken place at a similar time of year to the  
666 present. However this should have been reflected in behavioural ratings, and equivalently strong neural  
667 representations for recent memories, but neither was observed. Most importantly, if content rather  
668 than time-related consolidation was the main influence on memory detectability, then we would not  
669 have observed any change in neural representation scores from Experiment 1 to Experiment 2, rather  
670 than the hypothesised shifts which emerged.

671 A related concern is that memories across time differ in nature because they differ in availability.  
672 Successful memory search is biased towards recency, meaning there are more events to choose from in  
673 the last few weeks, than remote time periods. Here, this confound is circumvented by design, given that  
674 search was equivalently constrained and facilitated at each time-point by the frequency at which



675 participants took photographs, which was not assumed to change in a major way over time. These  
676 enduring “snap-shots” of memory, located within tight temporal windows (see Materials and methods)  
677 meant that memory selection was not confounded by retrieval difficulty or availability. It could also be  
678 argued that selection of time-points for this study should have been biased towards recency given that  
679 most forgetting occurs in the weeks and months after learning. However, it is important to dissociate  
680 systems-level consolidation from forgetting, as they are separate processes which are assumed to follow  
681 different time-courses. Memory forgetting follows an exponential decay [82], whereas systems-level  
682 consolidation has generally been assumed, until now, to be gradual and linear [83]. Our study was  
683 concerned only with vivid, unique memories which were likely to persist through the systems-level  
684 consolidation process.

685         A further potential concern regarding memory selection is that recent and remote memories  
686 which are comprised of equivalent levels of detail must be qualitatively different in some way. For  
687 example, selected remote memories must have been highly salient at the time of encoding to retain  
688 such high levels of detail. However, the underlying assumption that individual memories invariably  
689 become detail impoverished over time does not necessarily hold. While the volume of memories one  
690 can recall decreases over time [84], the amount of details one can recall from individual consolidated  
691 memories can actually increase over a one year delay [85]. While generalised representations are  
692 thought to emerge over the course of consolidation, they do not necessarily replace the original detailed  
693 memories [10], and the equivalent level of detail provided by participants across the two experiments  
694 here would suggest that memory specificity can be preserved over time. Furthermore, the possibility  
695 that remote memory selection may still be biased towards more salient memories is rendered unlikely  
696 by the method of memory sampling employed here. Because memories were chosen only from available  
697 photographic cues, the salience of recent and remote events was determined at the time of taking the  
698 photograph, and not during experimentation. These photographs served as potent triggers of remote  
699 memories which were not necessarily more salient than recent memories, and which may not have  
700 otherwise come to mind using a free recall paradigm. In addition, one would expect more salient remote

701 memories to score higher than recent memories on subjective ratings of vividness, personal significance  
702 or valence, but this was not the case. Therefore, stronger neural representations at more remote time-  
703 points were likely due to consolidation-related processes rather than qualitative difference between  
704 recent and remote experiences at the time of encoding.

705

## 706 **Value**

707 Given that the medial prefrontal cortex is often associated with value and emotional processing [86],  
708 could these factors have influenced the current findings? Humans display a bias towards consolidating  
709 positive memories [87], and remembered information is more likely to be valued than that which is  
710 forgotten [88]. Activity in vmPFC during autobiographical memory recall has been found to be  
711 modulated by both the personal significance and emotional content of memories [89]. However, in the  
712 current two experiments, memories were matched across time periods on these variables, and the  
713 selection of memories through photographs taken on a day-to day basis also mitigated against this  
714 effect. In the eight months between experiments, memories either remained unchanged or decreased  
715 slightly in their subjective ratings of significance and positivity, suggesting that these factors are an  
716 unlikely driving force behind the observed remote memory representations in vmPFC. For example, if  
717 recent memories in Experiment 1 were not well-represented in vmPFC because they were relatively  
718 insignificant, there is no reason to expect them to be more so eight months later, yet their neural  
719 representation strengthened over time nonetheless.

720

## 721 **Relation to previous findings**

722 A methodological discrepancy between this experiment and that conducted by Bonnici et al. [54], is the  
723 additional use of a photograph to assist in cueing memories. One possible interpretation of the neural  
724 representation scores is they represent a role for the vmPFC in the maintenance of visual working  
725 memory following cue offset. However, the prefrontal cortex is unlikely to contribute to maintenance of

726 visual information [90]. Furthermore, if this was the driving effect behind neural representations here,  
727 the effect would be equivalent across time-periods, yet it was not.

728         There is, however, an obvious inconsistency between the findings of the current study and that  
729 of Bonnici, et al. [54]. Unlike that study, we did not detect representations of 0.5M old memories in  
730 vmPFC. It could be that the support vector machine classification-based MVPA used by Bonnici et al. [54]  
731 is more sensitive to detection of memory representations than RSA, however, the current study was not  
732 optimised for such an analysis because it necessitated an increased ratio of conditions to trials.  
733 Nonetheless, the increase in memory representation scores from recent to remote memories was  
734 replicated and additionally refined in the current study with superior temporal precision. One  
735 observation which was consistent with the Bonnici findings was the detection of remote memories in the  
736 hippocampus, which also supports theories positing a perpetual role for this region in the vivid retrieval  
737 of autobiographical memories [10, 12]. However, the weak detectability observed at more recent time  
738 points may reflect a limitation of the RSA approach employed here to detect sparsely encoded  
739 hippocampal patterns, which may be overcome by a more targeted subfield analysis [91].

740         There are, however, distinct advantages to the use of RSA over pattern classification MVPA. RSA  
741 is optimal for a condition-rich design as it allows for the relationships between many conditions to be  
742 observed. For example, in the current experiment, a visual inspection of the group RSA matrix (S1 Fig)  
743 does not reveal an obvious clustering of recent or remote memories which would indicate content-  
744 independent neural patterns related to general retrieval processes. The approach employed by Bonnici  
745 et al. [54] assessed the distinctiveness of memories within each time-point from each other in order to  
746 detect memory representations. Should the neural patterns of a single memory become more consistent  
747 over time, yet also more similar to memories of the same age due to generic time-dependent  
748 mechanisms of retrieval, pattern classification would fail to detect a representation where one is  
749 present. In the current study, however, the two can be assessed separately, revealing memories at each  
750 time-point become distinct from both memories of all other ages (Fig 4A) and identically aged memories  
751 (Fig 4C). The machine learning approach employed by Bonnici et al. [54] to decode memory

752 representations also requires the division of data into ‘training’ and ‘testing’ sets to classify unseen  
753 neural patterns [53]. This reduces the number of trials available for analysis, which would have been  
754 suboptimal for the current design because it would have necessitated an increased number of conditions  
755 and fewer trials per memory, whereas this restriction is not a necessity for RSA. Finally, because the  
756 pattern classification approach used by Bonnici et al. [54] compared memories from each time-point  
757 directly to each other, they could not be analysed independently. In the current RSA design, the two sets  
758 of memories could be analysed separately from each other to ascertain if the temporal patterns could be  
759 replicated in an independent set of data. As is evident in Fig 4B, the non-monotonic pattern of vmPFC  
760 recruitment was present in both sets of memories. The suitability of each MVPA method, therefore,  
761 depends on the study design and the research questions being posed.

762         In the light of our hypotheses, Experiment 2 generated one anomalous finding. Twenty-four  
763 month old memories from Experiment 1 were no longer well represented eight months later. Why  
764 memories around 32M of age are not as reliant on vmPFC is unclear, but unlike other time-periods, we  
765 cannot verify this finding in the current experiment, as we did not sample 32M memories during  
766 Experiment 1.

767

## 768 **Summary**

769 The current results revealed that the recruitment of the vmPFC during the expression of  
770 autobiographical memories depends on the exact stage of systems-level consolidation, and that retrieval  
771 involves multiple sequential time-sensitive processes. These temporal patterns were remarkably  
772 preserved across completely different sets of memories in one experiment, and closely replicated in a  
773 subsequent longitudinal experiment with the same participants and memories. These findings support  
774 the notion that the vmPFC becomes increasingly important over time for the retrieval of remote  
775 memories. Two particularly novel findings emerged. First, this process occurs relatively quickly, by four  
776 months following an experience. Second, vmPFC involvement after this time fluctuates in a highly  
777 consistent manner, depending on the precise age of the memory in question. Further work is clearly

778 needed to explore the implications of these novel results. Overall, we conclude that our vmPFC findings  
779 may be explained by a dynamic interaction between the changing strength of a memory trace, the  
780 availability of temporally adjacent memories, and the concomitant differential strategies and schemas  
781 that are deployed to support the successful recollection of past experiences.

782

## 783 **Materials and methods**

### 784 **Ethics statement**

785 This study was approved by the local research ethics committee (University College London Research  
786 Ethics Committee, approval reference 6743/002). All investigations were conducted according to the  
787 principles expressed in the Declaration of Helsinki. Written informed consent was obtained for each  
788 participant.

789

790

791

### 792 **Experiment 1**

#### 793 ***Participants***

794 Thirty healthy, right handed participants (23 female) took part (mean age 25.3, SD 3.5, range 21-32).

795 All had normal or corrected-to-normal vision.

796

#### 797 ***Memory interview and selection of autobiographical memories***

798 Participants were instructed to select at least three photographs from each of eight time-points in their  
799 past (0.5M, 4M, 8M, 12M, 16M, 20M, 24M and 60M relative to the time of taking part in the  
800 experiment) which reminded them of vivid, unique and specific autobiographical events. The sampling  
801 was retrospective, in that the photographs were chosen from the participants' pre-existing photograph  
802 collections and not prospectively taken with the study in mind. Highly personal, emotionally negative or

803 repetitive events were deemed unsuitable. An additional requirement was that memories from the  
804 same time period should be dissimilar in content. For the four most recent time periods (0.5M-12M), the  
805 memories should have taken place within a temporal window two weeks either side of the specified  
806 date yielding a potential window of one month, for the next three time points (16M-24M), three weeks  
807 either side to allow a window of six weeks, and one month either side for the most remote time point  
808 (60M), giving a two month window. This graded approach was adopted to balance temporal precision  
809 with the availability of suitable memories at more remote time-points.

810 Participants were asked to describe in as much detail as possible the specific autobiographical  
811 memory elicited by a photograph. General probes were given by the interviewer where appropriate  
812 (e.g., “what else can you remember about this event?”). Participants were also asked to identify the  
813 most memorable part of the event which took place within a narrow temporal window and unfolded in  
814 an event-like way. They then created a short phrase pertaining to this episode, which was paired with  
815 the photograph to facilitate recall during the subsequent fMRI scan (Fig 1A). Participants were asked to  
816 rate each memory on a number of characteristics (see main text, Figs 1 and 6, S1 Table and S3 Table),  
817 and two memories from each time period which satisfied the criteria of high vividness and detail, and  
818 ease of recall were selected for recollection during the fMRI scan.

819

## 820 ***Behavioural analyses***

821 The interview was recorded and transcribed to facilitate an objective analysis of the details, and the  
822 widely-used Autobiographical Interview method was employed for scoring [57]. Details provided for  
823 each memory were scored as either “internal” (specific events, temporal references, places, perceptual  
824 observations and thoughts or emotions) or “external” (unrelated events, semantic knowledge, repetition  
825 of details or other more general statements). To assess inter-rater reliability, a subset of sixteen  
826 memories (n=2 per time period) were randomly selected across 16 different subjects and scored by  
827 another experimenter blind to the aims and conditions of the study. Intra-class coefficient estimates

828 were calculated using SPSS statistical package version 22 (SPSS Inc, Chicago, IL) based on a single  
829 measures, absolute-agreement, 2-way random-effects model.

830 As two memories per time period were selected for later recall in the scanner, behavioural  
831 ratings were averaged to produce one score per time period. Differences in subjective memory ratings  
832 across time periods were analysed using a one-way repeated measures ANOVA with Bonferroni-  
833 corrected paired t-tests. Differences in objective memory scores of internal and external details across  
834 time periods were analysed using a two-way repeated measures ANOVA with Bonferroni-corrected  
835 paired t-tests. A threshold of  $p < 0.05$  was used throughout both experiments. All ANOVAs were  
836 subjected to Greenhouse-Geisser adjustment to the degrees of freedom if Mauchly's sphericity test  
837 identified that sphericity had been violated.

838

#### 839 ***Task during fMRI scanning***

840 Participants returned approximately one week later (mean 6.9 days, SD 1) to recall the memories while  
841 undergoing an fMRI scan. Prior to the scan, participants were trained to recall each of the 16 memories  
842 within a 12 second recall period (as in Bonnici et al. [54], Bonnici and Maguire [55]), when cued by the  
843 photograph alongside its associated cue phrase. There were two training trials per memory, and  
844 participants were asked to vividly and consistently recall a particular period of the original event which  
845 unfolded across a temporal window matching the recall period.

846 During scanning, participants recalled each memory six times (6 trials x 16 memories = 96 trials).  
847 The two memories from each time period were never recalled together in the same session, nor was any  
848 one memory repeated within each session, resulting in 12 separate short sessions with eight trials in  
849 each, an approach recommended for optimal detection of condition-related activity patterns using  
850 MVPA [92]. Trials were presented in a random order within each session. On each trial, the photograph  
851 and associated pre-selected cue phrase relating to each event were displayed on screen for three  
852 seconds. Following removal of this cue, participants then closed their eyes and recalled the memory.  
853 After 12 seconds, the black screen flashed white twice, to cue the participant to open their eyes. The

854 participant was then asked to rate how vivid the memory recall had been using a five-key button box, on  
855 a scale of 1-5, where 1 was not vivid at all, and 5 was highly vivid. When the least vivid trials were  
856 excluded, the mean number of trials (/6) selected for analysis from each time-point were as follows:  
857 0.5M: 5.65 (SD 0.57), 4M: 5.50 (SD 0.56), 8M: 5.43 (SD 0.55), 12M: 5.50 (SD 0.63), 16M: 5.50 (SD 0.59),  
858 20M: 5.43 (SD 0.65), 24M: 5.42 (SD 0.56), 60M: 5.23 (SD 0.69).

859

### 860 ***MRI data acquisition***

861 Structural and functional data were acquired using a 3T MRI system (Magnetom TIM Trio, Siemens  
862 Healthcare, Erlangen, Germany). Both types of scan were performed within a partial volume which  
863 incorporated the entire extent of the ventromedial prefrontal cortex (Fig 3A).

864 Structural images were collected using a single-slab 3D T2-weighted turbo spin echo sequence  
865 with variable flip angles (SPACE) [93] in combination with parallel imaging, to simultaneously achieve a  
866 high image resolution of  $\sim 500 \mu\text{m}$ , high sampling efficiency and short scan time while maintaining a  
867 sufficient signal-to-noise ratio (SNR). After excitation of a single axial slab the image was read out with  
868 the following parameters: resolution =  $0.52 \times 0.52 \times 0.5 \text{ mm}$ , matrix =  $384 \times 328$ , partitions = 104,  
869 partition thickness = 0.5 mm, partition oversampling = 15.4%, field of view =  $200 \times 171 \text{ mm}^2$ , TE = 353  
870 ms, TR = 3200 ms, GRAPPA x 2 in phase-encoding (PE) direction, bandwidth = 434 Hz/pixel, echo spacing  
871 = 4.98 ms, turbo factor in PE direction = 177, echo train duration = 881, averages = 1.9. For reduction of  
872 signal bias due to, for example, spatial variation in coil sensitivity profiles, the images were normalized  
873 using a prescan, and a weak intensity filter was applied as implemented by the scanner's manufacturer.  
874 To improve the SNR of the anatomical image, three scans were acquired for each participant,  
875 coregistered and averaged. Additionally, a whole brain 3D FLASH structural scan was acquired with a  
876 resolution of  $1 \times 1 \times 1 \text{ mm}$ .

877 Functional data were acquired using a 3D echo planar imaging (EPI) sequence which has been  
878 demonstrated to yield improved BOLD sensitivity compared to 2D EPI acquisitions [94]. Image resolution  
879 was  $1.5\text{mm}^3$  and the field-of-view was 192mm in-plane. Forty slices were acquired with 20%



880 oversampling to avoid wrap-around artefacts due to imperfect slab excitation profile. The echo time (TE)  
881 was 37.30 ms and the volume repetition time (TR) was 3.65s. Parallel imaging with GRAPPA image  
882 reconstruction [95] acceleration factor 2 along the phase-encoding direction was used to minimize  
883 image distortions and yield optimal BOLD sensitivity. The dummy volumes necessary to reach steady  
884 state and the GRAPPA reconstruction kernel were acquired prior to the acquisition of the image data as  
885 described in Lutti et al. [94]. Correction of the distortions in the EPI images was implemented using B0-  
886 field maps obtained from double-echo FLASH acquisitions (matrix size 64x64; 64 slices; spatial resolution  
887 3mm<sup>3</sup>; short TE=10 ms; long TE=12.46 ms; TR=1020 ms) and processed using the FieldMap toolbox  
888 available in SPM [96].

889

#### 890 ***MRI data preprocessing***

891 fMRI data were analysed using SPM12 ([www.fil.ion.ucl.ac.uk/spm](http://www.fil.ion.ucl.ac.uk/spm)). All images were first bias corrected  
892 to compensate for image inhomogeneity associated with the 32 channel head coil [97]. Fieldmaps  
893 collected during the scan were used to generate voxel displacement maps. EPIs for each of the twelve  
894 sessions were then realigned to the first image and unwarped using the voxel displacement maps  
895 calculated above. The three high-resolution structural images were averaged to reduce noise, and co-  
896 registered to the whole brain structural scan. EPIs were also co-registered to the whole brain structural  
897 scan. Manual segmentation of the vmPFC was performed using ITK-SNAP on the group averaged  
898 structural scan normalised to MNI space. The normalised group mask was warped back into each  
899 participant's native space using the inverse deformation field generated by individual participant  
900 structural scan segmentations. The overlapping voxels between this participant-specific vmPFC mask and  
901 the grey matter mask generated by the structural scan segmentation were used to create a native-space  
902 grey matter vmPFC mask for each individual participant.

903

904

905

## 906 **Representational Similarity Analysis**

907 Functional data were analysed at the single subject level without warping or smoothing. Each recall trial  
908 was modelled as a separate GLM, which comprised the 12 second period from the offset of the memory  
909 cue to just before the white flash which indicated to the participant they should open their eyes. Motion  
910 parameters were included as regressors of no interest. RSA [56], was performed using the RSA toolbox  
911 (<http://www.mrc-cbu.cam.ac.uk/methods-and-resources/toolboxes/>) and custom MATLAB (version  
912 R2014a) scripts. In order to account for the varying levels of noise across voxels which can affect the  
913 results of multivariate fMRI analyses, multivariate noise normalisation [98] was performed on the  
914 estimated pattern of neural activity separately for each trial. This approach normalises the estimated  
915 beta weight of each voxel using the residuals of the first-level GLM and the covariance structure of this  
916 noise. This results in the down-weighting of noisier voxels and a more accurate estimate of the task-  
917 related activity of each voxel.

918 The average number of voxels analysed in the vmPFC across the two sets of memories was 5252  
919 (SD 1227). Whole ROI-based analysis was preferred to a searchlight approach which would involve  
920 comparing neural with model similarity matrices [99], as we did not have strong *a priori* hypothesis  
921 about changes in neural representations over time against which to test the neural data, nor did we  
922 want to make assumptions regarding the spatial distribution of informative voxels in the vmPFC.

923 As participants recalled two memories per time-point, the dataset was first split into two sets of  
924 eight time points, which were analysed separately using RSA. To characterise the strength of memory  
925 representations in the vmPFC, the similarity of neural patterns across recall trials of the same memory  
926 was first calculated using the Pearson product-moment correlation coefficient, resulting in a “within-  
927 memory” similarity score. Then the neural patterns of each memory were correlated with those of all  
928 other memories, yielding a “between-memory” similarity score. Both within- and between-memory  
929 correlations were performed on trials from separate runs. For each memory, the between-memory  
930 score was then subtracted from the within-memory score to provide a neural representation score (Fig  
931 3C). This score was then averaged across the two memories at each time-point. Results for the left and

932 the right hemispheres were highly similar, and therefore the data we report here are from the vmPFC  
933 bilaterally. A distinctive neural pattern associated with the recall of memories at each time period would  
934 yield a score significantly higher than zero, which was assessed using a one-sample t-test. Strengthening  
935 or weakening of memory representations as a function of remoteness would result in a significant  
936 difference in memory representation scores across time periods, and this was assessed using a one-way  
937 repeated measures ANOVA with post-hoc two-tailed paired t-tests. Error bars on graphs displaying  
938 neural representation scores were normalised to reflect within- rather than between-subject variability  
939 in absolute values, using the method recommended by Cousineau [100] for within-subjects designs. The  
940 range of values that we observed are entirely consistent with those in other studies employing a similar  
941 RSA approach in a variety of learning, memory and navigation tasks in a wide range of brain regions  
942 [101-110].

943

#### 944 ***Searchlight analysis***

945 An RSA searchlight analysis was conducted in normalised space, on multivariate noise-normalised data  
946 within the ROI. This approach selected every voxel within the ROI, and using a volumetric approach  
947 which is constrained by the shape of the ROI, expanded the area around that voxel until an area of 160  
948 voxels was reached. Within each of these spheres, memories were correlated with themselves, and  
949 other memories, analogous to the standard ROI approach. Then the resulting neural RSM was correlated  
950 using Spearman's rank correlation coefficient with a model RSM which consisted of ones along the  
951 diagonal and zeros on the off-diagonal. This model RSM was used to detect if individual memories were  
952 detectable across all time-points. For every voxel, the average correlation from every sphere it  
953 participated in was calculated, to generate a more representative score of its informational content.  
954 Parametric assumptions regarding the spatial distribution of unsmoothed data may not hold. Therefore  
955 we used statistical nonparametric mapping (SnPM13) on the resulting searchlight images. We used  
956 10,000 random permutations, a voxel-level significance threshold of  $t=3$ , and a family-wise-error  
957 corrected cluster-wise threshold of  $p<0.05$  within an ROI.

958

## 959 **Experiment 2**

### 960 ***Participants***

961 Sixteen of the 30 participants who took part in Experiment 1 returned to take part in Experiment 2 (14  
962 female, mean age 24.7, SD 3.1, range 21-33) approximately eight months later (8.4 months, SD 1.2).

963

### 964 ***Memory interview***

965 Participants were presented with the 16 photographs and cue phrases associated with the  
966 autobiographical memories in Experiment 1 and were asked to describe in as much detail as possible the  
967 specific event which they had recalled previously. General probes were given by the interviewer where  
968 appropriate (e.g. “what else can you remember about this event?”). The interviewer availed of  
969 summarised transcripts from Experiment 1 to verify the same memory and details were being recalled.  
970 Participants then rated each memory on the same characteristics assessed in Experiment 1. The  
971 memory interview during Experiment 2 was also recorded and transcribed.

972

### 973 ***Behavioural analyses***

974 The analysis of subjective and objective ratings for Experiment 2 followed exactly the same procedure as  
975 Experiment 1. The extent to which subjective ratings for the same memory had changed between  
976 Experiment 1 and Experiment 2 was assessed using a two-way (experiment x time period) repeated  
977 measures ANOVA with Bonferroni-corrected paired t-tests. Differences in objective memory ratings  
978 across experiments were analysed using a two (experiment) x two (detail) x eight (time period) repeated  
979 measures ANOVA with Bonferroni-corrected paired t-tests.

980

### 981 ***Task during fMRI scanning***

982 Participants returned approximately one week later for the fMRI scan (mean 5.5 days, SD 3.7). Prior to  
983 scanning, only one reminder training trial per memory was deemed necessary given the prior experience

984 of performing the task in Experiment 1. The scanning task remained unchanged from Experiment 1,  
985 aside from the re-randomisation of trials within each session. When the least vivid trials were excluded,  
986 the mean number of trials (/6) selected for analysis from each time period were as follows: 8M: 5.94 (SD  
987 0.25), 12M: 5.97 (SD 0.13), 16M: 5.88 (SD 0.29), 20M: 5.88 (SD 0.29), 24M: 5.94 (SD 0.25), 28M: 5.94 (SD  
988 0.17), 32M: 5.84 (SD 0.40), 68M: 5.81 (SD 0.36).

989

#### 990 ***MRI data acquisition***

991 Structural and functional data were acquired using the same scanner and scanning sequences as  
992 Experiment 1. However the prior acquisition of the partial volume structural MRI scans negated the need  
993 to include these in the protocol of Experiment 2.

994

#### 995 ***MRI data preprocessing***

996 fMRI data were preprocessed using the same pipeline as Experiment 1, with the additional step of co-  
997 registering the functional scans of Experiment 2 to the structural scans of Experiment 1, which enabled  
998 the use of the vmPFC masks from Experiment 1. First-level GLMs of each recall trial were constructed in  
999 an identical manner to Experiment 1.

1000

#### 1001 ***Representational Similarity Analysis***

1002 RSA of the Experiment 2 fMRI data was conducted in an identical manner to Experiment 1. The average  
1003 number of voxels analysed in the vmPFC across the two sets of memories for all participants was 5228  
1004 (SD 1765). To ascertain whether the observed neural representation scores had changed between  
1005 Experiments 1 and 2, a two-way (experiment x time period) repeated measures ANOVA was performed.  
1006 To investigate if these changes mirrored the predictions generated by the original data, paired t-tests  
1007 were performed between the neural representation scores for each memory from Experiment 1 and  
1008 Experiment 2, one-tailed if there was a hypothesised increase or decrease.

1009

## 1010 Acknowledgements

1011 We thank David Bradbury and the Imaging Support team for technical assistance.

1012

## 1013 References

1014

- 1015 1. Kandel ER. The molecular biology of memory storage: a dialogue between genes and synapses.  
1016 Science. 2001;294(5544):1030-8.
- 1017 2. Pastalkova E, Serrano P, Pinkhasova D, Wallace E, Fenton AA, Sacktor TC. Storage of spatial  
1018 information by the maintenance mechanism of LTP. Science. 2006;313(5790):1141-4.
- 1019 3. Runyan JD, Dash PK. Inhibition of hippocampal protein synthesis following recall disrupts  
1020 expression of episodic-like memory in trace conditioning. Hippocampus. 2005;15(3):333-9.
- 1021 4. Guzowski JF. Insights into immediate-early gene function in hippocampal memory consolidation  
1022 using antisense oligonucleotide and fluorescent imaging approaches. Hippocampus.  
1023 2002;12(1):86-104.
- 1024 5. Morris RG, Moser EI, Riedel G, Martin SJ, Sandin J, Day M, et al. Elements of a neurobiological  
1025 theory of the hippocampus: the role of activity-dependent synaptic plasticity in memory. Phil  
1026 Trans R Soc Lond B, Biol Sci. 2003;358(1432):773-86.
- 1027 6. Frankland PW, Bontempi B. The organization of recent and remote memories. Nature Rev  
1028 Neurosci. 2005;6(2):119-30.
- 1029 7. Squire LR, Genzel L, Wixted JT, Morris RG. Memory consolidation. Cold Spring Harbor  
1030 Perspectives in Biology. 2015;7(8):a021766.
- 1031 8. Moscovitch M, Rosenbaum RS, Gilboa A, Addis DR, Westmacott R, Grady C, et al. Functional  
1032 neuroanatomy of remote episodic, semantic and spatial memory: a unified account based on  
1033 multiple trace theory. J Anat. 2005;207(1):35-66.
- 1034 9. Winocur G, Moscovitch M. Memory transformation and systems consolidation. JINS.  
1035 2011;17(5):766-80.
- 1036 10. Moscovitch M, Cabeza R, Winocur G, Nadel L. Episodic memory and beyond: The hippocampus  
1037 and neocortex in transformation. Ann Rev Psychol. 2016;67:105-34.
- 1038 11. Maguire EA. Memory consolidation in humans: new evidence and opportunities. Exp Physiol.  
1039 2014;99(3):471-86.
- 1040 12. Maguire EA, Mullally SL. The hippocampus: a manifesto for change. J Exp Psych: Gen.  
1041 2013;142(4):1180-9.
- 1042 13. Zhao MG, Toyoda H, Lee YS, Wu LJ, Ko SW, Zhang XH, et al. Roles of NMDA NR2B subtype  
1043 receptor in prefrontal long-term potentiation and contextual fear memory. Neuron.  
1044 2005;47(6):859-72.
- 1045 14. Lesburgueres E, Gobbo OL, Alaux-Cantin S, Hambucken A, Trifilieff P, Bontempi B. Early tagging of  
1046 cortical networks is required for the formation of enduring associative memory. Science.  
1047 2011;331(6019):924-8.
- 1048 15. Leon WC, Bruno MA, Allard S, Nader K, Cuellar AC. Engagement of the PFC in consolidation and  
1049 recall of recent spatial memory. Learn Mem. 2010;17(6):297-305.
- 1050 16. Einarsson EO, Nader K. Involvement of the anterior cingulate cortex in formation, consolidation,  
1051 and reconsolidation of recent and remote contextual fear memory. Learn Mem. 2012;19(10):449-  
1052 52.
- 1053 17. Tse D, Takeuchi T, Takekuma M, Kajii Y, Okuno H, Tohyama C, et al. Schema-dependent gene  
1054 activation and memory encoding in neocortex. Science. 2011;333(6044):891-5.
- 1055 18. Maviel T, Durkin TP, Menzaghi F, Bontempi B. Sites of neocortical reorganization critical for  
1056 remote spatial memory. Science. 2004;305(5680):96-9.
- 1057 19. Teixeira CM, Pomedli SR, Maei HR, Kee N, Frankland PW. Involvement of the anterior cingulate  
1058 cortex in the expression of remote spatial memory. J Neurosci. 2006;26(29):7555-64.

- 1059 20. Lopez J, Herbeaux K, Cosquer B, Engeln M, Muller C, Lazarus C, et al. Context-dependent  
1060 modulation of hippocampal and cortical recruitment during remote spatial memory retrieval.  
1061 *Hippocampus*. 2012;22(4):827-41.
- 1062 21. Frankland PW, Bontempi B, Talton LE, Kaczmarek L, Silva AJ. The involvement of the anterior  
1063 cingulate cortex in remote contextual fear memory. *Science*. 2004;304(5672):881-3.
- 1064 22. Luo F, Zheng J, Sun X, Deng WK, Li BM, Liu F. Prelimbic cortex extracellular signal-regulated kinase  
1065 1/2 activation is required for memory retrieval of long-term inhibitory avoidance. *Brain Res*.  
1066 2017;1661:88-99.
- 1067 23. Liu F, Zheng XL, Li BM. The anterior cingulate cortex is involved in retrieval of long-term/long-  
1068 lasting but not short-term memory for step-through inhibitory avoidance in rats. *Neurosci Lett*.  
1069 2009;460(2):175-9.
- 1070 24. Ding HK, Teixeira CM, Frankland PW. Inactivation of the anterior cingulate cortex blocks  
1071 expression of remote, but not recent, conditioned taste aversion memory. *Learn Mem*.  
1072 2008;15(5):290-3.
- 1073 25. Takehara K, Kawahara S, Kirino Y. Time-dependent reorganization of the brain components  
1074 underlying memory retention in trace eyeblink conditioning. *J Neurosci*. 2003;23(30):9897-905.
- 1075 26. Kitamura T, Ogawa SK, Roy DS, Okuyama T, Morrissey MD, Smith LM, et al. Engrams and circuits  
1076 crucial for systems consolidation of a memory. *Science*. 2017;356(6333):73-8.
- 1077 27. Takehara-Nishiuchi K, Nakao K, Kawahara S, Matsuki N, Kirino Y. Systems consolidation requires  
1078 postlearning activation of NMDA receptors in the medial prefrontal cortex in trace eyeblink  
1079 conditioning. *J Neurosci*. 2006;26(19):5049-58.
- 1080 28. Restivo L, Vetere G, Bontempi B, Ammassari-Teule M. The formation of recent and remote  
1081 memory is associated with time-dependent formation of dendritic spines in the hippocampus and  
1082 anterior cingulate cortex. *J Neurosci*. 2009;29(25):8206-14.
- 1083 29. Vetere G, Restivo L, Cole CJ, Ross PJ, Ammassari-Teule M, Josselyn SA, et al. Spine growth in the  
1084 anterior cingulate cortex is necessary for the consolidation of contextual fear memory. *Proc Natl*  
1085 *Acad Sci USA*. 2011;108(20):8456-60.
- 1086 30. Bero AW, Meng J, Cho S, Shen AH, Canter RG, Ericsson M, et al. Early remodeling of the neocortex  
1087 upon episodic memory encoding. *Proc Natl Acad Sci USA* . 2014;111(32):11852-7.
- 1088 31. Nieuwenhuis IL, Takashima A. The role of the ventromedial prefrontal cortex in memory  
1089 consolidation. *Behavioural Brain Res*. 2011;218(2):325-34.
- 1090 32. Bertossi E, Tesini C, Cappelli A, Ciaramelli E. Ventromedial prefrontal damage causes a pervasive  
1091 impairment of episodic memory and future thinking. *Neuropsychologia*. 2016;90:12-24.
- 1092 33. McCormick C, Ciaramelli E, De Luca F, Maguire EA. Comparing and contrasting the cognitive  
1093 effects of hippocampal and ventromedial prefrontal cortex damage: A review of human lesion  
1094 studies. *Neuroscience*. 2017. doi: 10.1016/j.neuroscience.2017.07.066
- 1095 34. Turner MS, Cipolotti L, Yousry TA, Shallice T. Confabulation: damage to a specific inferior medial  
1096 prefrontal system. *Cortex*. 2008;44(6):637-48.
- 1097 35. Takashima A, Petersson KM, Rutters F, Tendolkar I, Jensen O, Zwarts MJ, et al. Declarative  
1098 memory consolidation in humans: a prospective functional magnetic resonance imaging  
1099 study. *Proc Natl Acad Sci USA* . 2006;103(3):756-61.
- 1100 36. Takashima A, Nieuwenhuis IL, Jensen O, Talamini LM, Rijpkema M, Fernandez G. Shift from  
1101 hippocampal to neocortical centered retrieval network with consolidation. *J Neurosci*.  
1102 2009;29(32):10087-93.
- 1103 37. Watanabe T, Kimura HM, Hirose S, Wada H, Imai Y, Machida T, et al. Functional dissociation  
1104 between anterior and posterior temporal cortical regions during retrieval of remote memory. *J*  
1105 *Neurosci*. 2012;32(28):9659-70.
- 1106 38. Harand C, Bertran F, La Joie R, Landeau B, Mezenge F, Desgranges B, et al. The hippocampus  
1107 remains activated over the long term for the retrieval of truly episodic memories. *PLoS One*.  
1108 2012;7(8):e43495.



- 1109 39. Furman O, Mendelsohn A, Dudai Y. The episodic engram transformed: Time reduces retrieval-  
1110 related brain activity but correlates it with memory accuracy. *Learn Mem.* 2012;19(12):575-87.  
1111 40. Svoboda E, McKinnon MC, Levine B. The functional neuroanatomy of autobiographical memory: a  
1112 meta-analysis. *Neuropsychologia.* 2006;44(12):2189-208.  
1113 41. Niki K, Luo J. An fMRI study on the time-limited role of the medial temporal lobe in long-term  
1114 topographical autobiographic memory. *J Cogn Neurosci.* 2002;14(3):500-7.  
1115 42. Oddo S, Lux S, Weiss PH, Schwab A, Welzer H, Markowitsch HJ, et al. Specific role of medial  
1116 prefrontal cortex in retrieving recent autobiographical memories: an fMRI study of young female  
1117 subjects. *Cortex.* 2010;46(1):29-39.  
1118 43. Piolino P, Giffard-Quillon G, Desgranges B, Chetelat G, Baron JC, Eustache F. Re-experiencing old  
1119 memories via hippocampus: a PET study of autobiographical memory. *NeuroImage.*  
1120 2004;22(3):1371-83.  
1121 44. Maguire EA, Henson RN, Mummery CJ, Frith CD. Activity in prefrontal cortex, not hippocampus,  
1122 varies parametrically with the increasing remoteness of memories. *Neuroreport.* 2001;12(3):441-  
1123 4.  
1124 45. Maguire EA, Frith CD. Lateral asymmetry in the hippocampal response to the remoteness of  
1125 autobiographical memories. *J Neurosci.* 2003;23(12):5302-7.  
1126 46. Piefke M, Weiss PH, Markowitsch HJ, Fink GR. Gender differences in the functional neuroanatomy  
1127 of emotional episodic autobiographical memory. *Hum Brain Mapp.* 2005;24(4):313-24.  
1128 47. Ryan L, Nadel L, Keil K, Putnam K, Schnyer D, Trouard T, et al. Hippocampal complex and retrieval  
1129 of recent and very remote autobiographical memories: evidence from functional magnetic  
1130 resonance imaging in neurologically intact people. *Hippocampus.* 2001;11(6):707-14.  
1131 48. Gilboa A, Winocur G, Grady CL, Hevenor SJ, Moscovitch M. Remembering our past: functional  
1132 neuroanatomy of recollection of recent and very remote personal events. *Cereb Cortex.*  
1133 2004;14(11):1214-25.  
1134 49. Rekkas PV, Constable RT. Evidence that autobiographic memory retrieval does not become  
1135 independent of the hippocampus: an fMRI study contrasting very recent with remote events. *J*  
1136 *Cogn Neurosci.* 2005;17(12):1950-61.  
1137 50. Steinvorth S, Corkin S, Halgren E. Ecphory of autobiographical memories: an fMRI study of recent  
1138 and remote memory retrieval. *NeuroImage.* 2006;30(1):285-98.  
1139 51. Soderlund H, Moscovitch M, Kumar N, Mandic M, Levine B. As time goes by: hippocampal  
1140 connectivity changes with remoteness of autobiographical memory retrieval. *Hippocampus.*  
1141 2012;22(4):670-9.  
1142 52. Tsukiura T, Fujii T, Okuda J, Ohtake H, Kawashima R, Itoh M, et al. Time-dependent contribution  
1143 of the hippocampal complex when remembering the past: a PET study. *Neuroreport.*  
1144 2002;13(17):2319-23.  
1145 53. Chadwick MJ, Bonnici HM, Maguire EA. Decoding information in the human hippocampus: a  
1146 user's guide. *Neuropsychologia.* 2012;50(13):3107-21.  
1147 54. Bonnici HM, Chadwick MJ, Lutti A, Hassabis D, Weiskopf N, Maguire EA. Detecting  
1148 representations of recent and remote autobiographical memories in vmPFC and hippocampus. *J*  
1149 *Neurosci.* 2012;32(47):16982-91.  
1150 55. Bonnici HM, Maguire EA. Two years later - Revisiting autobiographical memory representations in  
1151 vmPFC and hippocampus. *Neuropsychologia.* 2017 (Forthcoming: doi:  
1152 10.1016/j.neuropsychologia.2017.05.014).  
1153 56. Kriegeskorte N, Kievit RA. Representational geometry: integrating cognition, computation, and  
1154 the brain. *Trends Cogn Sci.* 2013;17(8):401-12.  
1155 57. Levine B, Svoboda E, Hay JF, Winocur G, Moscovitch M. Aging and autobiographical memory:  
1156 Dissociating episodic from semantic retrieval. *Psychol Aging.* 2002;17(4):677-89.  
1157 58. Mackey S, Petrides M. Architecture and morphology of the human ventromedial prefrontal  
1158 cortex. *Eur J Neurosci.* 2014;40(5):2777-96.



- 1159 59. Hebscher M, Levine B, Gilboa, A. The precuneus and hippocampus contribute to individual  
1160 differences in the unfolding of spatial representations during episodic autobiographical memory.  
1161 *Neuropsychologia*. 2017;110:123-33.
- 1162 60. Sheldon S, Levine B. Same as it ever was: vividness modulates the similarities and differences  
1163 between the neural networks that support retrieving remote and recent autobiographical  
1164 memories. *NeuroImage*. 2013;83:880-91.
- 1165 61. Teyler TJ, DiScenna P. The role of hippocampus in memory: a hypothesis. *Neurosci Biobehav Rev*.  
1166 1985;9(3):377-89.
- 1167 62. Squire LR, Alvarez P. Retrograde amnesia and memory consolidation: a neurobiological  
1168 perspective. *Curr Opin Neurobiol*. 1995;5(2):169-77.
- 1169 63. Nadel L, Winocur G, Ryan L, Moscovitch M. Systems consolidation and hippocampus: two views.  
1170 *Debates in Neuroscience*. 2007;1(2-4):55-66.
- 1171 64. Dudai Y. The restless engram: consolidations never end. *Ann Rev Neurosci*. 2012;35:227-47.
- 1172 65. Barry DN, Coogan AN, Commins S. The time course of systems consolidation of spatial memory  
1173 from recent to remote retention: A comparison of the Immediate Early Genes *Zif268*, *c-Fos* and  
1174 *Arc*. *Neurobiol Learn Mem*. 2016;128:46-55.
- 1175 66. Jadhav SP, Rothschild G, Roumis DK, Frank LM. Coordinated Excitation and Inhibition of Prefrontal  
1176 Ensembles during Awake Hippocampal Sharp-Wave Ripple Events. *Neuron*. 2016;90(1):113-27.
- 1177 67. Eichenbaum H. Memory: organization and control. *Ann Rev Psychol*. 2017;68:19-45.
- 1178 68. Navawongse R, Eichenbaum H. Distinct pathways for rule-based retrieval and spatial mapping of  
1179 memory representations in hippocampal neurons. *J Neurosci*. 2013;33(3):1002-13.
- 1180 69. Schnider A, von Daniken C, Gutbrod K. Disorientation in amnesia. A confusion of memory traces.  
1181 *Brain*. 1996;119 ( Pt 5):1627-32.
- 1182 70. Crovitz HF, Schiffman H. Frequency of episodic memories as a function of their age. *Bull*  
1183 *Psychonomic Soc*. 1974;4:517-8.
- 1184 71. Konkle T, Brady TF, Alvarez GA, Oliva A. Scene memory is more detailed than you think: the role  
1185 of categories in visual long-term memory. *Psychol Science*. 2010;21(11):1551-6.
- 1186 72. Hardt O, Nader K, Nadel L. Decay happens: the role of active forgetting in memory. *Trends Cogn*  
1187 *Sci*. 2013;17(3):111-20.
- 1188 73. Bauer PJ, Larkina M. Predicting remembering and forgetting of autobiographical memories in  
1189 children and adults: a 4-year prospective study. *Memory*. 2016;24(10):1345-68.
- 1190 74. vanKesteren MT, Beul SF, Takashima A, Henson RN, Ruiters DJ, Fernandez G. Differential roles for  
1191 medial prefrontal and medial temporal cortices in schema-dependent encoding: from congruent  
1192 to incongruent. *Neuropsychologia*. 2013;51(12):2352-9.
- 1193 75. Warren DE, Jones SH, Duff MC, Tranel D. False recall is reduced by damage to the ventromedial  
1194 prefrontal cortex: implications for understanding the neural correlates of schematic memory. *J*  
1195 *Neurosci*. 2014;34(22):7677-82.
- 1196 76. Gilboa A, Marlatte H. Neurobiology of schemas and schema-mediated memory. *Trends Cogn Sci*.  
1197 2017;21(8):618-31.
- 1198 77. Berkers RM, van Kesteren MT. Autobiographical memory transformation across consolidation. *J*  
1199 *Neurosci*. 2013;33(13):5435-6.
- 1200 78. Nader K. Reconsolidation and the dynamic nature of memory. *Cold Spring Harbor Perspectives in*  
1201 *Biology*. 2015;7(10):a021782.
- 1202 79. Schwabe L, Wolf OT. New episodic learning interferes with the reconsolidation of  
1203 autobiographical memories. *PLoS One*. 2009;4(10):e7519.
- 1204 80. Antony JW, Ferreira CS, Norman KA, Wimber M. Retrieval as a fast route to memory  
1205 consolidation. *Trends Cogn Sci*. 2017;21(8):573-6.
- 1206 81. Nadel L, Campbell J, Ryan L. Autobiographical memory retrieval and hippocampal activation as a  
1207 function of repetition and the passage of time. *Neural Plasticity*. 2007;2007:90472.
- 1208 82. Averell L, Heathcote A. The form of the forgetting curve and the fate of memories. *J Math*  
1209 *Psychol*. 2011; 55(1):25-35.

- 1210 83. McClelland JL, McNaughton BL, O'Reilly RC. Why there are complementary learning systems in  
1211 the hippocampus and neocortex: Insights from the successes and failures of connectionist models  
1212 of learning and memory. *Psychol Rev.* 1995;102(3):419-57.
- 1213 84. Rubin DC. On the retention function for autobiographical memory. *J Verb Learn Verb Be.*  
1214 1982;21(1):21-38.
- 1215 85. Campbell J, Nadel L, Duke D, Ryan L. Remembering all that and then some: recollection of  
1216 autobiographical memories after a 1-year delay. *Memory.* 2011;19(4):406-15.
- 1217 86. Grabenhorst F, Rolls ET. Value, pleasure and choice in the ventral prefrontal cortex. *Trends Cogn*  
1218 *Sci.* 2011;15(2):56-67.
- 1219 87. Anderson MC, Hanslmayr S. Neural mechanisms of motivated forgetting. *Trends in Cogn Sci.*  
1220 2014;18(6):279-92.
- 1221 88. Rhodes MG, Witherby AE, Castel AD, Murayama K. Explaining the forgetting bias effect on value  
1222 judgments: The influence of memory for a past test. *Mem Cogn.* 2017;45(3):362-74.
- 1223 89. Lin WJ, Horner AJ, Burgess N. Ventromedial prefrontal cortex, adding value to autobiographical  
1224 memories. *Scientific Rep.* 2016;6:28630.
- 1225 90. Lee SH, Kravitz DJ, Baker CI. Goal-dependent dissociation of visual and prefrontal cortices during  
1226 working memory. *Nat Neurosci.* 2013;16(8):997-9.
- 1227 91. Bonnici HM, Chadwick MJ, Maguire EA. Representations of recent and remote autobiographical  
1228 memories in hippocampal subfields. *Hippocampus.* 2013;23(10):849-54.
- 1229 92. Coutanche MN, Thompson-Schill SL. The advantage of brief fMRI acquisition runs for multi-voxel  
1230 pattern detection across runs. *NeuroImage.* 2012;61(4):1113-9.
- 1231 93. Mugler JP, 3rd, Bao S, Mulkern RV, Guttman CR, Robertson RL, Jolesz FA, et al. Optimized single-  
1232 slab three-dimensional spin-echo MR imaging of the brain. *Radiology.* 2000;216(3):891-9.
- 1233 94. Lutti A, Thomas DL, Hutton C, Weiskopf N. High-resolution functional MRI at 3 T: 3D/2D echo-  
1234 planar imaging with optimized physiological noise correction. *Magn Reson Med.*  
1235 2013;69(6):1657-64.
- 1236 95. Griswold MA, Jakob PM, Heidemann RM, Nittka M, Jellus V, Wang J, et al. Generalized  
1237 autocalibrating partially parallel acquisitions (GRAPPA). *Magn Reson Med.* 2002;47(6):1202-10.
- 1238 96. Hutton C, Bork A, Josephs O, Deichmann R, Ashburner J, Turner R. Image distortion correction in  
1239 fMRI: A quantitative evaluation. *NeuroImage.* 2002;16(1):217-40.
- 1240 97. Van Leemput K, Maes F, Vandermeulen D, Suetens P. Automated model-based tissue  
1241 classification of MR images of the brain. *IEEE Transactions on Medical Imaging.* 1999;18(10):897-  
1242 908.
- 1243 98. Walther A, Nili H, Ejaz N, Alink A, Kriegeskorte N, Diedrichsen J. Reliability of dissimilarity  
1244 measures for multi-voxel pattern analysis. *NeuroImage.* 2016;137:188-200.
- 1245 99. Kriegeskorte N, Goebel R, Bandettini P. Information-based functional brain mapping. *Proc Natl*  
1246 *Acad Sci USA.* 2006;103(10):3863-8.
- 1247 100. Cousineau D. Confidence intervals in within-subject designs: A simpler solution to Loftus and  
1248 Masson's method. *Tutorials in Quantitative Methods for Psychology.* 2005;1(1):42-5.
- 1249 101. Chadwick MJ, Jolly AEJ, Amos DP, Hassabis D, Spiers HJ. A goal direction signal in the human  
1250 entorhinal/subicular region. *Curr Biol.* 2015;25(1):87-92.
- 1251 102. Hsieh L-T, Gruber MJ, Jenkins LJ, Ranganath C. Hippocampal activity patterns carry information  
1252 about objects in temporal context. *Neuron.* 2014;81(5):1165-78.
- 1253 103. Schapiro AC, Turk-Browne NB, Norman KA, Botvinick MM. Statistical learning of temporal  
1254 community structure in the hippocampus. *Hippocampus.* 2016;26(1):3-8.
- 1255 104. Schuck Nicolas W, Cai Ming B, Wilson Robert C, Niv Y. Human orbitofrontal cortex represents a  
1256 cognitive map of state space. *Neuron.* 2016;91(6):1402-12.
- 1257 105. Kim M, Jeffery KJ, Maguire EA. Multivoxel pattern analysis reveals 3D place information in the  
1258 human hippocampus. *J Neurosci.* 2017;37(16):4270-4279.
- 1259 106. Hsieh L-T, Ranganath C. Cortical and subcortical contributions to sequence retrieval: Schematic  
1260 coding of temporal context in the neocortical recollection network. *NeuroImage.* 2015;121:78-90.

- 1261 107. Deuker L, Bellmund JLS, Navarro Schröder T, Doeller CF. An event map of memory space in the  
1262 hippocampus. *ELife*. 2016;5:e16534.
- 1263 108. Bellmund JLS, Deuker L, Navarro Schröder T, Doeller CF. Grid-cell representations in mental  
1264 simulation. *ELife*. 2016;5:e17089.
- 1265 109. Milivojevic B, Vicente-Grabovetsky A, Doeller CF. Insight reconfigures hippocampal-prefrontal  
1266 memories. *Curr Biol*. 2015;25(7):821-30.
- 1267 110. Staresina BP, Henson RNA, Kriegeskorte N, Alink A. Episodic reinstatement in the medial  
1268 temporal lobe. *J Neurosci*. 2012;32(50):18150-6.
- 1269  
1270  
1271  
1272

1273 **Supporting Information**

1274

1275 **S1 Table. Behavioural data for Experiment 1 (mean, SD) - Experiment 1 (n=30).**

| <b>A. Subjective ratings</b> | 0.5M         | 4M           | 8M           | 12M          | 16M          | 20M          | 24M          | 60M          |
|------------------------------|--------------|--------------|--------------|--------------|--------------|--------------|--------------|--------------|
| Vividness                    | 4.53 (0.52)  | 4.28 (0.55)  | 4.22 (0.50)  | 4.05 (0.53)  | 4.25 (0.50)  | 4.10 (0.50)  | 4.10 (0.52)  | 4.13 (0.67)  |
| Detail                       | 4.38 (0.54)  | 3.88 (0.61)  | 3.93 (0.49)  | 3.67 (0.75)  | 3.80 (0.60)  | 3.68 (0.71)  | 3.80 (0.57)  | 3.77 (0.78)  |
| Effort                       | 1.25 (0.39)  | 1.53 (0.45)  | 1.52 (0.50)  | 1.87 (0.57)  | 1.72 (0.47)  | 1.58 (0.44)  | 1.57 (0.49)  | 1.77 (0.57)  |
| Personal significance        | 3.45 (0.88)  | 3.47 (0.75)  | 3.62 (0.80)  | 3.13 (0.85)  | 3.10 (0.93)  | 3.25 (0.98)  | 3.32 (0.72)  | 3.43 (0.83)  |
| Valence                      | 4.60 (0.46)  | 4.47 (0.51)  | 4.58 (0.47)  | 4.38 (0.60)  | 4.37 (0.57)  | 4.33 (0.44)  | 4.33 (0.50)  | 4.45 (0.58)  |
| Active(1)/static event(2)    | 1.20 (0.25)  | 1.25 (0.31)  | 1.22 (0.31)  | 1.20 (0.28)  | 1.18 (0.31)  | 1.30 (0.39)  | 1.25 (0.34)  | 1.37 (0.37)  |
| Self(1)/other perspective(2) | 1.03 (0.13)  | 1.17 (0.36)  | 1.13 (0.29)  | 1.12 (0.25)  | 1.08 (0.19)  | 1.10 (0.24)  | 1.10 (0.20)  | 1.08 (0.27)  |
| Recall frequency             | 3.23 (0.63)  | 2.78 (0.61)  | 2.95 (0.66)  | 2.55 (0.70)  | 2.72 (0.61)  | 2.88 (0.69)  | 2.63 (0.66)  | 2.83 (0.65)  |
| Consistency                  | 4.28 (0.49)  | 4.08 (0.76)  | 3.83 (0.75)  | 3.93 (0.54)  | 4.02 (0.65)  | 3.98 (0.53)  | 3.85 (0.71)  | 3.73 (0.69)  |
| <b>B. Objective scores</b>   |              |              |              |              |              |              |              |              |
| Internal details             | 17.60 (5.42) | 14.95 (3.95) | 15.37 (5.96) | 14.72 (6.75) | 15.60 (4.84) | 14.93 (5.74) | 14.43 (3.89) | 13.65 (4.50) |
| External details             | 6.35 (3.82)  | 6.03 (3.34)  | 6.38 (3.75)  | 6.08 (3.53)  | 5.82 (2.56)  | 6.02 (2.83)  | 5.78 (2.84)  | 6.07 (3.42)  |

1276

1277

1278

1279 **S2 Table. Neural representation scores (mean, SD) for other brain regions in Experiment 1 (n=30).**

| <b>Neural Representation</b> | 0.5M                  | 4M                   | 8M                    | 12M                   | 16M                   | 20M                   | 24M                   | 60M                   |
|------------------------------|-----------------------|----------------------|-----------------------|-----------------------|-----------------------|-----------------------|-----------------------|-----------------------|
| Precuneus                    | <b>.012 (.017)***</b> | <b>.011 (.020)**</b> | <b>.015 (.013)***</b> | <b>.013 (.012)***</b> | <b>.011 (.015)***</b> | <b>.013 (.014)***</b> | <b>.016 (.018)***</b> | <b>.016 (.017)***</b> |
| Lateral temporal cortex      | <b>.004 (.011)*</b>   | <b>.007 (.013)*</b>  | <b>.005 (.010)**</b>  | <b>.007 (.012)**</b>  | .003 (.009)           | <b>.007 (.009)***</b> | <b>.007 (.013)**</b>  | <b>.007 (.011)***</b> |
| Parahippocampal cortex       | .004 (.011)           | .003 (.011)          | .005 (.013)           | <b>.005 (.013)*</b>   | .003 (.013)           | <b>.006 (.014)*</b>   | <b>.008 (.009)***</b> | <b>.011 (.015)***</b> |
| Retrosplenial cortex         | .000 (.014)           | .001 (.018)          | .005 (.019)           | .005 (.015)           | <b>.006 (.015)*</b>   | .006 (.017)           | .004 (.017)           | <b>.008 (.017)*</b>   |
| Temporal pole                | .003 (.009)           | .002 (.012)          | .003 (.012)           | .003 (.009)           | .001 (.010)           | .002 (.009)           | <b>.006 (.009)**</b>  | <b>.008 (.008)***</b> |
| Entorhinal/Perirhinal cortex | .002 (.012)           | .004 (.013)          | .000 (.012)           | .002 (.011)           | -.003 (.015)          | .000 (.014)           | .001 (.012)           | <b>.006 (.013)*</b>   |
| Hippocampus                  | .001 (.007)           | .000 (.010)          | .002 (.011)           | .003 (.010)           | -.001 (.012)          | .001 (.010)           | .001 (.009)           | <b>.004 (.008)**</b>  |

1280 Asterisks indicate detectability from chance (\* p < 0.05, \*\* p < 0.01, \*\*\* p < 0.001).

1281

1282

1283

1284 **S3 Table. Behavioural data for Experiment 2 (mean, SD) - Experiment 2 (n=16).**

| <b>A. Subjective ratings</b> | (0.5M) 8M    | (4M) 12M     | (8M) 16M     | (12M) 20M    | (16M) 24M    | (20M) 28M    | (24M) 32M    | (60M) 68M    |
|------------------------------|--------------|--------------|--------------|--------------|--------------|--------------|--------------|--------------|
| Vividness                    | 3.47 (0.72)  | 3.41 (0.84)  | 3.34 (0.68)  | 3.19 (0.79)  | 3.09 (0.66)  | 3.31 (0.77)  | 3.22 (0.71)  | 3.09 (0.80)  |
| Detail                       | 3.22 (0.63)  | 3.25 (0.84)  | 3.13 (0.56)  | 2.84 (0.65)  | 3.06 (0.66)  | 3.09 (0.76)  | 2.97 (0.62)  | 2.75 (0.80)  |
| Difficulty                   | 2.34 (0.60)  | 2.19 (0.85)  | 2.22 (0.82)  | 2.28 (0.58)  | 2.25 (0.63)  | 2.22 (0.75)  | 2.28 (0.97)  | 2.25 (0.61)  |
| Personal significance        | 2.97 (0.69)  | 3.13 (0.74)  | 3.22 (0.66)  | 2.78 (0.75)  | 2.84 (0.87)  | 2.94 (0.87)  | 2.66 (0.79)  | 3.00 (0.86)  |
| Valence                      | 4.31 (0.54)  | 4.28 (0.63)  | 4.28 (0.60)  | 4.06 (0.75)  | 4.22 (0.68)  | 4.03 (0.74)  | 3.97 (0.56)  | 4.38 (0.65)  |
| Active(1)/static event(2)    | 1.31 (0.31)  | 1.41 (0.42)  | 1.38 (0.34)  | 1.47 (0.43)  | 1.19 (0.31)  | 1.34 (0.47)  | 1.34 (0.40)  | 1.28 (0.31)  |
| Self(1)/other perspective(2) | 1.09 (0.20)  | 1.13 (0.29)  | 1.13 (0.29)  | 1.16 (0.30)  | 1.00 (0.00)  | 1.06 (0.17)  | 1.16 (0.24)  | 1.09 (0.27)  |
| Recall frequency             | 2.03 (0.69)  | 2.00 (0.80)  | 1.78 (0.75)  | 1.72 (0.45)  | 1.84 (0.77)  | 1.81 (0.70)  | 1.50 (0.48)  | 1.53 (0.59)  |
| Consistency                  | 3.94 (0.36)  | 3.94 (0.44)  | 3.91 (0.61)  | 3.88 (0.67)  | 3.91 (0.55)  | 4.00 (0.58)  | 3.81 (0.63)  | 3.72 (0.71)  |
| <b>B. Objective scores</b>   |              |              |              |              |              |              |              |              |
| Internal details             | 18.75 (7.77) | 17.56 (6.83) | 17.59 (7.33) | 18.66 (7.88) | 19.63 (7.72) | 20.31 (8.00) | 17.06 (6.53) | 16.03 (6.69) |
| External details             | 6.25 (4.27)  | 5.66 (4.06)  | 5.91 (2.78)  | 6.47 (4.46)  | 7.16 (3.34)  | 9.28 (5.40)  | 8.41 (5.18)  | 6.66 (4.36)  |

1285  
1286

1287  
1288  
1289

1290

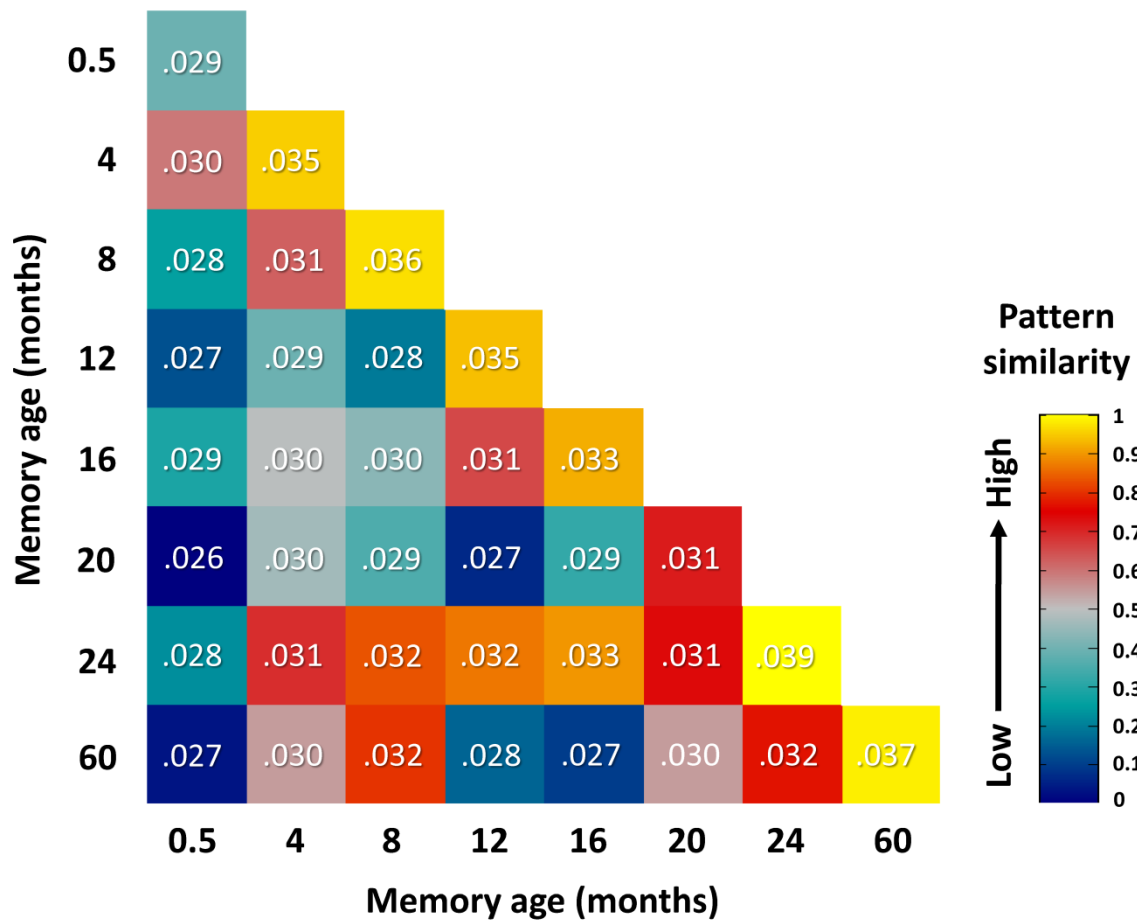

1291

1292

1293

1294

1295

1296

1297

1298

1299

1300

1301

**S1 Fig. Representational similarity matrix of within- and between time-point pattern similarity values for Experiment 1.** Each cell in this matrix contains the group mean pattern similarity score between memories from all sampled time-points, averaged across the two memory sets. The values along the diagonal represent the within-memory similarity for each time-point. Off-diagonal values indicate the correlation of neural patterns between memories of different ages, which are subsequently averaged to produce the baseline “between-memory” value and subtracted from the “within-memory” correlation to produce a neural representation score. For ease of visual inspection, all values are rank transformed, scaled between zero and one and colour coded to indicate the magnitude of pattern similarity.

1302

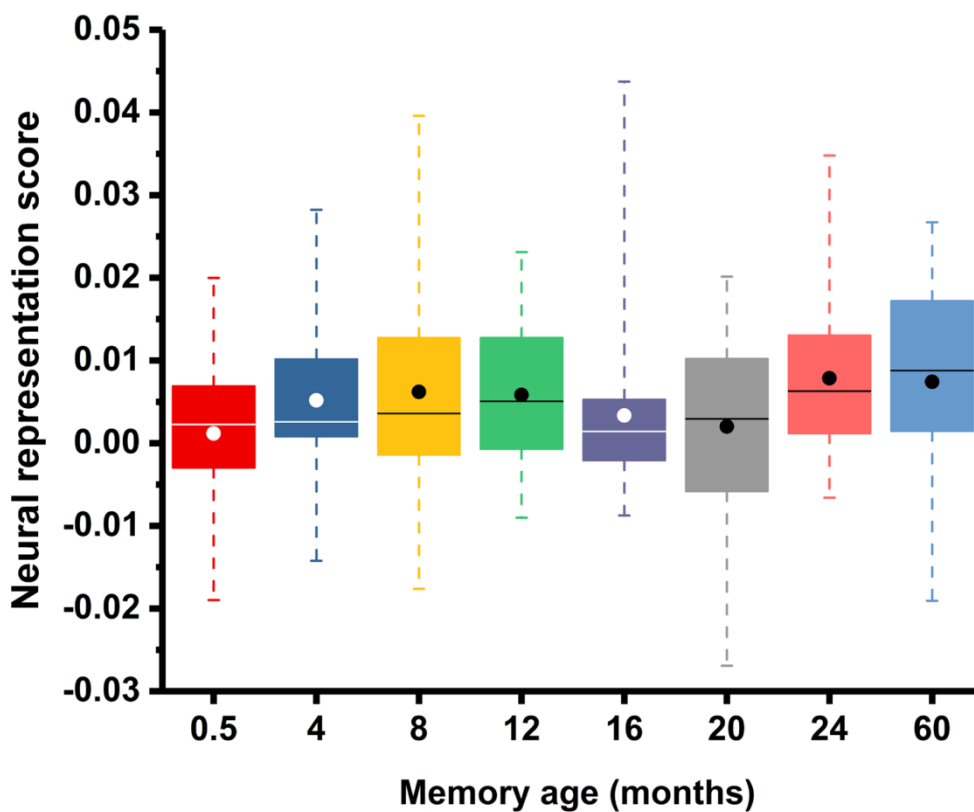

1303

1304 **S2 Fig. Boxplot of neural representation scores for Experiment 1.** Boxes represent 25<sup>th</sup> to 75<sup>th</sup> percentiles around  
1305 the median; whiskers represent minimum and maximum values, means are indicated by solid circles (see S8 Data  
1306 for individual participant numerical values).

1307

1308



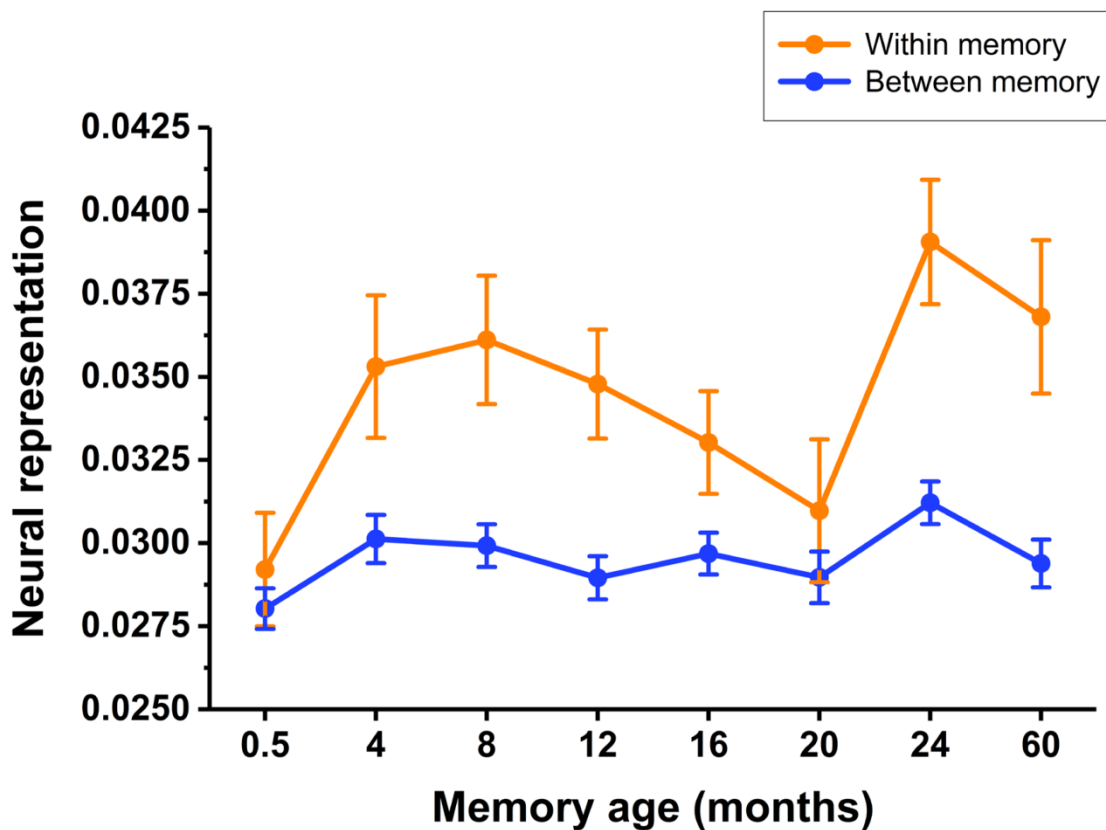

1309

1310 **S3 Fig. Within- versus between time-point pattern similarity for Experiment 1.** Time-dependent changes in neural  
1311 representation scores were driven by within- rather than between-memory scores (see S9 Data for individual  
1312 participant numerical values).

1313

1314

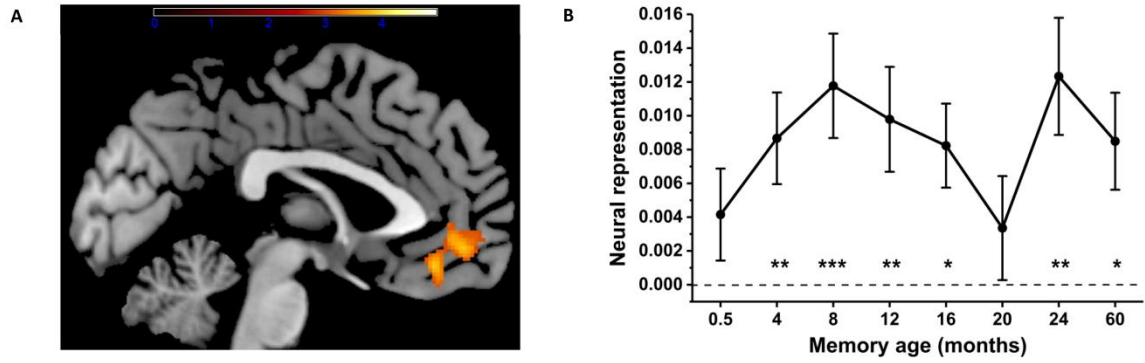

1315

1316 **S4 Fig. Results of the group vmPFC searchlight analysis in MNI space for Experiment 1.** (A) Colour-coded areas  
1317 represent the FWE-corrected T-statistic where within-memory detectability was higher than between-memory  
1318 detectability across participants. (B) Comparison of memory detectability across time-points within this  
1319 functionally defined area, showing highly similar results to the whole ROI analysis in native space (see S10 Data for  
1320 individual participant numerical values).

1321

1322
